# Supplementary material
Source: HighWire-hosted journal article supplement (https://bjsm.bmj.com/content/53/21/1341)
Supplement: inline-supplementary-material-1 [file inline-supplementary-material-1.pdf]

## Supplementary Material

### Contents

|                                                  |    |
|--------------------------------------------------|----|
| 1. MEDLINE Search Strategy.....                  | 2  |
| 2. McMaster Critical Appraisal Tool.....         | 3  |
| 3. Summary of Study Characteristics .....        | 4  |
| 4. List of references for included studies ..... | 12 |
| 5. Outcome of Risk of Bias Assessment.....       | 20 |
| 6. Funnel Plots for Publication Bias.....        | 26 |

**Supplementary Material 1. Search Strategy for MEDLINE Database**

|                                  | <b>Keywords</b>                                                                                                                                                                                                                                                                                     | <b>MeSH headings</b>                                                                                                                                                              |
|----------------------------------|-----------------------------------------------------------------------------------------------------------------------------------------------------------------------------------------------------------------------------------------------------------------------------------------------------|-----------------------------------------------------------------------------------------------------------------------------------------------------------------------------------|
| <b>Population set<br/>(OR)</b>   | Myocardial infarct*<br>Heart attack*<br>MI<br>AMI<br>Myocardial revasculari#ation*<br>Coronary artery bypass*<br>CABG<br>CABS<br>Coronary adj2 angioplast*<br>Percutaneous coronary intervention*<br>Percutaneous coronary revasculari#ation*<br>PCI<br>PTCA<br>STEMI<br>NSTEMI<br>STEACS<br>NSTEMI | Myocardial infarction<br>Myocardial revascularization<br>Coronary artery bypass<br>Myocardial reperfusion<br>Angioplasty, Balloon, Coronary<br>Percutaneous coronary intervention |
| <b>(AND)</b>                     |                                                                                                                                                                                                                                                                                                     |                                                                                                                                                                                   |
| <b>Intervention set<br/>(OR)</b> | Rehab*<br>Exercise*<br>Aerobic*<br>Train*                                                                                                                                                                                                                                                           | Rehabilitation<br>Exercise therapy<br>Exercise movement techniques<br>"recovery of function"<br>Physical conditioning, human                                                      |
| <b>(AND)</b>                     |                                                                                                                                                                                                                                                                                                     |                                                                                                                                                                                   |
| <b>Outcome set<br/>(OR)</b>      | Fitness<br>Exercise tolerance<br>Max* oxygen uptake<br>Peak oxygen uptake<br>Max* oxygen consumption<br>Peak oxygen consumption<br>VO2max<br>VO2peak                                                                                                                                                | Physical fitness<br>Exercise tolerance<br>Oxygen consumption                                                                                                                      |

**Supplementary Material 2.** McMaster Critical Appraisal Tool (modified).

| <b>Domain</b>                               | <b>Question(s)</b>                                                                                                                                                                 | <b>Outcome (points awarded)</b>                                            |
|---------------------------------------------|------------------------------------------------------------------------------------------------------------------------------------------------------------------------------------|----------------------------------------------------------------------------|
| 1. Study purpose                            | Was the purpose of the study clearly described in terms of population, intervention, comparison and outcome?                                                                       | 0 No / Unsure<br>1 Yes                                                     |
| 2. Study design                             | Was the study a randomised controlled trial (RCT)?                                                                                                                                 | 0 No / Unsure<br>1 Controlled<br>2 Controlled AND randomised               |
| 3. Sample                                   | Was the sample described in detail?                                                                                                                                                | 0 No / Unsure<br>1 Yes                                                     |
| 4. Reliability/validity of outcome measures | a) Were the outcome measures indicated as reliable<br>b) Were the outcome measures validated?                                                                                      | 0 No / Unsure<br>1 Yes                                                     |
| 5. Intervention                             | a) Intervention was described in detail?<br>b) Was contamination and co-intervention addressed?                                                                                    | 0 No / Unsure<br>1 Yes                                                     |
| 6. Compliance                               | a) Was compliance with attendance reported or controlled for?<br>b) Was compliance with exercise intensity reported or controlled for?                                             | 0 No / Unsure<br>1 Attendance OR compliance<br>2 Attendance AND compliance |
| 7. Statistical analysis                     | a) Results were reported in terms of statistical significance, confidence intervals or effect sizes?<br>b) Were the analysis method(s) appropriate?<br>c) Drop-outs were reported? | 0 No / Unsure<br>1 Yes                                                     |
| 8. Conclusions                              | Were the interpretation and conclusions of the results relevant to the strength of the study?                                                                                      | 0 No / Unsure<br>1 Yes                                                     |
| <b>Total points:</b>                        |                                                                                                                                                                                    | <b>/ 10</b>                                                                |

**Supplementary Material 3. Summary of Study Characteristics.**

| Study                             | Year | Participant characteristics |           |            | Rehabilitation protocols |       |                   |                        |                                  |                   |      | Outcomes |      |       |                             |                             |      |
|-----------------------------------|------|-----------------------------|-----------|------------|--------------------------|-------|-------------------|------------------------|----------------------------------|-------------------|------|----------|------|-------|-----------------------------|-----------------------------|------|
|                                   |      | n (men)                     | Age       | Conditions | Length                   | Freq. | Exercise duration | Intensity              | Mode                             | Type              | Sup. | Prog.    | Res. | Comp. | $\Delta\text{VO}_2\text{R}$ | $\Delta\text{VO}_2\text{A}$ |      |
| Aamot et al. <sup>1</sup>         | 2014 | (1)                         | 34 (28)   | 56 ± 9     | MI CABG ACS              | 12    | 2                 | W:10; A:4x4 (R:4); C:5 | l:85-95 (R:70) %HRp              | TM                | Int  | CL       | N    | N     | N                           | 4.30                        | 0.33 |
|                                   |      | (2)                         | 28 (25)   | 58 ± 8     | MI CABG ACS              | 12    | 2                 | W:10; A:4x4 (R:4); C:5 | l:85-95 (R:70) %HRp              | Circuit           | Int  | CL       | N    | N     | N                           | 3.30                        | 0.27 |
|                                   |      | (3)                         | 28 (27)   | 58 ± 8     | MI CABG ACS              | 12    | 2                 | W:10; A:4x4 (R:4); C:5 | l:85-95 (R:70) %HRp              | Walk              | Int  | H        | N    | N     | N                           | 2.90                        | 0.25 |
| Aamot et al. <sup>2</sup>         | 2010 |                             | 20 (15)   | 61 ± 11    | MI                       | 4     | 2                 | W10; A:30-35; C:10     | 'light-moderate'                 | NS                | Cont | CL       | N    | Y     | N                           | 0.10                        | 0.00 |
| Ades et al. <sup>3</sup>          | 1989 | (1)                         | 12 (NS)   | 51 ± 3     | MI CABG                  | 12    | 3                 | A:50                   | 70-85 %HRp                       | TM, CE, RW        | Cont | CL       | N    | N     | N                           | 2.40                        |      |
|                                   |      | (2)                         | 28 (NS)   | 52 ± 6     | MI CABG                  |       |                   |                        |                                  |                   |      |          |      |       |                             | 6.50                        |      |
| Ades et al. <sup>4</sup>          | 1992 | (1)                         | 37 (37)   | 68 ± 5     | MI CABG                  | 12    | 3                 | A:50                   | 75-90 %HRp                       | TM, CE, RW        | Cont | CL       | N    | N     | N                           | 3.00                        |      |
|                                   |      | (2)                         | 17 (0)    | 70 ± 6     | MI CABG                  |       |                   |                        |                                  |                   |      |          |      |       |                             | 3.00                        |      |
| Ades et al. <sup>5</sup>          | 1995 |                             | 60 (41)   | 68 ± 5     | MI CABG                  | 12    | 3                 | A:60                   | wk1-2:75-85, wk3-12:85-90 %HRp   | TM, CE, RW        | Cont | CL       | Y    | N     | N                           | 3.00                        |      |
| Ades et al. <sup>6</sup>          | 1999 |                             | 303 (227) | 61 ± 12    | ACE                      | 12    | 3                 | A:30-45                | 70-85 %HRp                       | TM, CE, RW        | Cont | CL       | N    | Y     | N                           | 3.30                        |      |
| Akashi et al. <sup>7</sup>        | 2002 |                             | 21 (17)   | 61 ± 9     | MI CABG VR               | 2     | 5                 | A:30                   | 100 %VT                          | CE                | Cont | CL       | N    | N     | N                           | 2.10                        |      |
| Arak-Luckmann et al. <sup>8</sup> | 2002 |                             | 35 (NS)   | 61 ± 9     | CABG PCI                 | 12    | 3                 | W:10; A:30; C:10       | 80 %VT                           | CE                | Cont | CL       | N    | N     | Y                           | 2.40                        |      |
| Arthur et al. <sup>9</sup>        | 2002 | (1)                         | 122 (96)  | 63 ± 9     | CABG                     | 26    | 3                 | W:10; A:40; C:10       | wk1-12:60, wk13-26:70 %VO2p      | TM, CE, AE, Steps | Cont | CL       | Y    | N     | Y                           | 3.19                        | 0.28 |
|                                   |      | (2)                         | 120 (101) | 64 ± 9     | CABG                     | 26    | 5                 | A:40                   | wk1-12:60, wk13-26:70 %VO2p      | Walk              | Cont | H        | Y    | N     | Y                           | 2.17                        | 0.17 |
| Arvan <sup>10</sup>               | 1988 |                             | 40 (29)   | 62 ± 9     | MI                       | 12    | 3                 | W:10; A:30-45; C:10    | wk1-2:50-75, wk3-12:75-85 %VO2p  | TM, CE, AE        | Cont | CL       | Y    | N     | N                           | 13.00                       |      |
| Balsam et al. <sup>11</sup>       | 2013 |                             | 52 (46)   | 54 ± 7     | MI                       | 6     | 3-5               | W:1; A:30; C:1.5       | 100 %VT, 50 %HRR                 | CE                | Cont | CL       | N    | N     | N                           | 7.00                        |      |
| Belardinelli et al. <sup>12</sup> | 2001 |                             | 59 (49)   | 53 ± 11    | PCI                      | 26    | 3                 | W:15; A:30; C:5        | 60 %VO2p                         | CE                | Cont | CL       | N    | N     | N                           | 5.10                        | 0.38 |
| Benetti et al. <sup>13</sup>      | 2010 | (1)                         | 29 (29)   | NS         | MI                       | 12    | 5                 | W:3; A:45; C:5         | 85 %HRp                          | TM                | Cont | CL       | N    | N     | Y                           | 12.40                       |      |
|                                   |      | (2)                         | 29 (29)   | NS         | MI                       | 12    | 5                 | W:3; A:45; C:5         | 75 %HRp                          | TM                | Cont | CL       | N    | N     | Y                           | 5.90                        |      |
| Bilinska et al. <sup>14</sup>     | 2010 |                             | 60 (60)   | 54 ± 5     | CABG                     | 6     | 3                 | A: NSx4 (R:2)          | l:70-80 (R:NS) %HRp              | CE                | Int  | CL       | N    | N     | N                           | 1.80                        |      |
| Bilinska et al. <sup>15</sup>     | 2013 |                             | 50 (50)   | 57 ± 6     | CABG                     | 6     | 3                 | A: NSx4 (R:2)          | l:70-80 (R:NS) %HRp              | CE                | Int  | CL       | N    | N     | N                           | 2.40                        |      |
| Blumenthal et al. <sup>16</sup>   | 1988 | (1)                         | 23 (23)   | 52 ± 8     | MI                       | 12    | 3                 | W:10; A:30-45; C:10    | 75 %VO2p                         | TM                | Cont | CL       | N    | N     | N                           | 3.10                        | 0.20 |
|                                   |      | (2)                         | 23 (23)   | 53 ± 8     | MI                       | 12    | 3                 | W:10; A:30-45; C:10    | <45 %VO2p                        | TM                | Cont | CL       | N    | N     | N                           | 3.30                        | 0.30 |
| Cesari et al. <sup>17</sup>       | 2013 |                             | 112 (92)  | 58 ± 10    | ACS                      | 4     | 3                 | W:5; A:30; C:5         | 60-70 %VO2p                      | CE                | Cont | CL       | N    | N     | N                           | 2.00                        |      |
| Choo et al. <sup>18</sup>         | 2007 |                             | 31 (27)   | 54 ± 11    | MI                       | 8     | 3                 | A:60                   | 40-55 (↑0.5MET p/wk) 70-85 %VO2p | TM, CE, AE, Steps | Cont | CL       | Y    | N     | Y                           | 4.30                        |      |

| Study                                | Year | Participant characteristics |          |            | Rehabilitation protocols |       |                   |                                             |                                                 |                       |      |       | Outcomes |       |                            |                            |      |
|--------------------------------------|------|-----------------------------|----------|------------|--------------------------|-------|-------------------|---------------------------------------------|-------------------------------------------------|-----------------------|------|-------|----------|-------|----------------------------|----------------------------|------|
|                                      |      | n (men)                     | Age      | Conditions | Length                   | Freq. | Exercise duration | Intensity                                   | Mode                                            | Type                  | Sup. | Prog. | Res.     | Comp. | $\Delta$ VO <sub>2</sub> R | $\Delta$ VO <sub>2</sub> A |      |
| Chuang et al. <sup>19</sup>          | 2005 | (1)                         | 17 (15)  | 64 ± 8     | CABG                     | 12    | 2                 | A:30                                        | 70-80 %HRp, 60-70 %VO <sub>2</sub> p, RPE 11-15 | TM                    | Cont | CL    | N        | N     | N                          | 4.76                       |      |
|                                      |      | (2)                         | 15 (13)  | 69 ± 12    | CABG                     |       |                   |                                             |                                                 |                       |      |       |          |       |                            | 1.72                       |      |
| Chudilova et al. <sup>20</sup>       | 2007 |                             | 10 (10)  | 64 ± 7     | CABG                     | 12    | 3                 | W:10; A:wk1-2:40, wk3-12:25; C:10           | 100 %AT                                         | CE                    | Cont | CL    | N        | N     | N                          | 3.80                       | 0.34 |
| Chung et al. <sup>21</sup>           | 2010 |                             | 42 (39)  | 56 ± 13    | MI                       | 8     | 3                 | A:50                                        | 50-60 %HRR (BB:RPE13)                           | TM, CE                | Cont | CL    | N        | N     | N                          | 5.60                       |      |
| Ciske et al. <sup>22</sup>           | 1986 | (1)                         | 24 (NS)  | 53 ± 2     | MI CABG                  | 4     | 3                 | A:30-40; C:5                                | 60-80 %VO <sub>2</sub> p                        | TM, CE, AE, RW        | Cont | CL    | N        | N     | N                          | 3.40                       | 0.25 |
|                                      |      | (2)                         | 15 (NS)  | 54 ± 2     | MI CABG                  |       |                   |                                             |                                                 |                       |      |       |          |       |                            | 4.30                       | 0.34 |
| Cottin et al. <sup>23</sup>          | 1996 |                             | 17 (14)  | 52 ± 16    | MI                       | 7     | 3                 | A:60                                        | 75-85 %HRp                                      | TM, CE, AE            | Cont | CL    | N        | N     | Y                          | 5.00                       |      |
| Cottin et al. <sup>24</sup>          | 2000 |                             | 15 (12)  | 56 ± 12    | MI                       | 7     | 3                 | A:60                                        | 75-85 %HRp                                      | TM, CE, AE            | Cont | CL    | Y        | N     | Y                          | 5.00                       |      |
| Currie et al. <sup>25</sup>          | 2015 | (1)                         | 10 (9)   | 66 ± 8     | MI PCI CABG              | 12    | 2                 | W:10; A:wk1-4:30, wk5-8:40, wk9-12:50; C:10 | 57 %WRp                                         | CE                    | Cont | CL    | Y        | N     | N                          | 3.40                       |      |
|                                      |      | (2)                         | 9 (9)    | 63 ± 8     | MI PCI CABG              | 12    | 2                 | W:10; A:10x1 (R:1); C:10                    | l:wk1-4:85, 5-8:100, 9-12:108 (R:10) %WRp       | CE                    | Int  | CL    | Y        | N     | N                          | 5.30                       |      |
| Degre et al. <sup>26</sup>           | 1997 |                             | 10 (10)  | 51 ± NS    | MI                       | 8     | 3                 | A:25                                        | 70-90 'capacity'                                | CE                    | Mix  | CL    | N        | N     | N                          |                            | 0.38 |
| Detry et al. <sup>27</sup>           | 1975 |                             | 7 (NS)   | 48 ± 8     | MI                       | 12    | 3                 | A:45                                        | 70-80 %VO <sub>2</sub> p                        | NS                    | Cont | CL    | N        | N     | N                          | 4.43                       | 0.33 |
| DeWitt et al. <sup>28</sup>          | 1986 | (1)                         | 16 (12)  | 56 ± NS    | MI                       | 6     | 4-6               | A:20-60                                     | 70 %VO <sub>2</sub> p                           | TM, CE, AE, RW        | Cont | CL    | N        | N     | N                          | 2.70                       | 0.21 |
|                                      |      | (2)                         | 11 (8)   | 53 ± NS    | MI                       |       |                   |                                             |                                                 |                       |      |       |          |       |                            | 1.90                       | 0.16 |
| Dobra.-Wasil. et al. <sup>29</sup>   | 2009 | (1)                         | 90 (90)  | 52 ± NS    | MI                       | 5     | 3                 | A:20                                        | 80 %HRR                                         | CE                    | Cont | CL    | N        | N     | N                          | 2.10                       | 0.10 |
|                                      |      | (2)                         | 61 (61)  | 55 ± NS    | CABG                     |       |                   |                                             |                                                 |                       |      |       |          |       |                            | 2.20                       | 0.20 |
| Dressendorfer et al. <sup>30</sup>   | 1990 | (1)                         | 45 (45)  | 54 ± NS    | MI                       | 4.5   | 2-3               | A:20-30                                     | 60-80 %VO <sub>2</sub> p                        | TM, CE, AE, RW, Tramp | Cont | CL    | N        | N     | N                          | 3.70                       |      |
|                                      |      | (2)                         | 27 (27)  | 55 ± NS    | MI                       |       |                   |                                             |                                                 |                       |      |       |          |       |                            | 3.80                       |      |
| Dressendorfer et al. <sup>31</sup>   | 1993 |                             | 17 (17)  | 53 ± 2     | MI                       | 4.5   | 3                 | A:30-35                                     | Stage 4 of modified Bruce                       | TM, CE, AE, RW, Tramp | Cont | CL    | N        | N     | N                          | 3.80                       |      |
| Dressendorfer et al. <sup>32</sup>   | 1995 | (1)                         | 13 (13)  | 55 ± 2     | MI CABG                  | 4.5   | 2                 | W:5-10; A:30-35                             | 70 %VO <sub>2</sub> p                           | TM, CE, AE, RW        | Cont | CL    | N        | N     | N                          | 3.60                       |      |
|                                      |      | (2)                         | 12 (12)  | 56 ± 3     | MI CABG                  | 4.5   | 3                 | W:5-10; A:30-35                             | 70 %VO <sub>2</sub> p                           | TM, CE, AE, RW        | Cont | CL    | N        | N     | N                          | 3.90                       |      |
| Fontes-Carvalho et al. <sup>33</sup> | 2015 |                             | 89 (76)  | 55 ± 10    | MI                       | 8     | 3                 | W:10; A+R:50; C:10                          | 70-85 %HRp                                      | TM, CE                | Cont | CL    | N        | N     | N                          | 1.90                       | 0.12 |
| Fujimoto et al. <sup>34</sup>        | 1999 |                             | 20 (20)  | NS         | MI                       | 2     | 14                | A:10                                        | 80 %AT                                          | CE                    | Cont | CL    | N        | N     | N                          | 3.40                       |      |
| Ghroubi et al. <sup>35</sup>         | 2013 |                             | 16 (NS)  | 59 ± 6     | CABG                     | 8     | 3                 | A:20                                        | 70 %HRR                                         | CE                    | Cont | CL    | N        | N     | N                          | 1.70                       |      |
| Giallauria et al. <sup>36</sup>      | 2006 |                             | 20 (16)  | 69 ± 2     | MI                       | 12    | 3                 | W:5; A:30; C:5                              | 60 %VO <sub>2</sub> p                           | CE                    | Cont | CL    | N        | N     | N                          | 4.50                       |      |
| Giallauria et al. <sup>37</sup>      | 2006 |                             | 104 (81) | 69 ± 3     | MI                       | 12    | 3                 | W:5; A:30; C:5                              | 60 %VO <sub>2</sub> p                           | CE                    | Cont | CL    | N        | N     | N                          | 2.90                       |      |
| Giallauria et al. <sup>38</sup>      | 2009 | (1)                         | 26 (22)  | 58 ± 8     | MI                       | 12    | 3                 | W:5; A:30; C:5                              | 60-70 %VO <sub>2</sub> p                        | CE                    | Cont | CL    | N        | N     | N                          | 3.20                       |      |
|                                      |      | (2)                         | 26 (22)  | 57 ± 10    | MI                       |       |                   |                                             |                                                 |                       |      |       |          |       |                            | 3.50                       |      |

| Study                           | Year | Participant characteristics |           |              | Rehabilitation protocols |       |                     |                                              |                        |                    |      |       | Outcomes |       |                            |                            |      |
|---------------------------------|------|-----------------------------|-----------|--------------|--------------------------|-------|---------------------|----------------------------------------------|------------------------|--------------------|------|-------|----------|-------|----------------------------|----------------------------|------|
|                                 |      | n (men)                     | Age       | Conditions   | Length                   | Freq. | Exercise duration   | Intensity                                    | Mode                   | Type               | Sup. | Prog. | Res.     | Comp. | $\Delta$ VO <sub>2</sub> R | $\Delta$ VO <sub>2</sub> A |      |
| Giallauria et al. <sup>39</sup> | 2009 | 30 (23)                     | 59 ± 3    | MI           | 26                       | 3     | W:5; A:30; C:5      | 60-70 %VO <sub>2</sub> p                     | CE                     | Cont               | CL   | N     | N        | N     | 5.20                       |                            |      |
| Giallauria et al. <sup>40</sup> | 2011 | 37 (28)                     | 61 ± 7    | MI           | 26                       | 3     | W:5; A:30; C:5      | 60-70 %VO <sub>2</sub> p                     | CE                     | Cont               | CL   | N     | N        | Y     | 4.60                       |                            |      |
| Giallauria et al. <sup>41</sup> | 2013 | 25 (22)                     | 54 ± 7    | MI           | 26                       | 3     | W:5; A:30; C:5      | 60-70 %VO <sub>2</sub> p                     | CE                     | Cont               | CL   | N     | N        | N     | 4.00                       |                            |      |
| Goodman et al. <sup>42</sup>    | 1999 | 31 (NS)                     | 53 ± 1    | CABG         | 12                       | 5     | W A C:45-60         | wk1-5:60, wk6-12:75-80 %VO <sub>2</sub> p    | Walk                   | Cont               | CL/H | Y     | N        | N     | 2.00                       | 0.19                       |      |
| Gremeaux et al. <sup>43</sup>   | 2010 | (1)                         | 7 (7)     | 45 ± 5       | PCI                      | 5     | 3                   | A:60                                         | 100 %VT                | CE AE              | Cont | CL    | N        | Y     | N                          | 1.20                       |      |
|                                 |      | (2)                         | 7 (7)     | 53 ± 1       | PCI                      | 5     | 3                   | A:60                                         | 100 %VT                | AE+CE              | Cont | CL    | N        | Y     | N                          | 3.50                       |      |
| Haennel et al. <sup>44</sup>    | 1991 | 8 (8)                       | 52 ± 4    | CABG         | 8                        | 3     | W:5; A:24; C:10     | 70 %HRR                                      | CE                     | Cont               | CL   | N     | N        | N     | 4.30                       | 0.33                       |      |
| Han et al. <sup>45</sup>        | 2017 | 29 (26)                     | 56 ± 11   | MI           | 14.5                     | 2-3   | W:5; A:30; C:5      | 55-70 %VO <sub>2</sub> p, 100% VT, RPE 12-13 | CR                     | Cont               | CL   | N     | Y        | N     | 4.5                        | 0.32                       |      |
| Hansen et al. <sup>46</sup>     | 2007 | (1)                         | 21 (17)   | 64 ± 9       | PCI CABG                 | 7     | 3                   | A:40                                         | 65 %VO <sub>2</sub> p  | Walk, CE, AE       | Cont | CL    | N        | N     | N                          | NS                         |      |
|                                 |      | (2)                         | 21 (16)   | 67 ± 8       | PCI CABG                 |       |                     |                                              |                        |                    |      |       |          |       |                            | NS                         |      |
| Hansen et al. <sup>47</sup>     | 2008 | (1)                         | 67 (55)   | 63 ± 9       | AMI CABG PCI             | 7     | 3                   | A:40                                         | 65 %VO <sub>2</sub> p  | Walk, CE, AE       | Cont | CL    | N        | N     | Y                          | NS                         |      |
|                                 |      | (2)                         | 67 (54)   | 63 ± 10      | AMI CABG PCI             | 7     | 3                   | A:60                                         | 65 %VO <sub>2</sub> p  | Walk, CE, AE       | Cont | CL    | N        | N     | Y                          | NS                         |      |
| Hermes et al. <sup>48</sup>     | 2015 | (1)                         | 12 (10)   | 60 ± 9       | CABG                     | 12    | 2                   | A:30                                         | 55-65 %HRR             | TM, CE             | Cont | CL    | N        | Y     | N                          | NS                         |      |
|                                 |      | (2)                         | 12 (7)    | 55 ± 8       | CABG                     |       |                     |                                              |                        |                    |      |       |          |       |                            | NS                         |      |
| Hsu et al. <sup>49</sup>        | 2011 | 34 (27)                     | 57 ± 13   | CABG         | 26                       | 3     | W:10; A:25-30; C:10 | 50-80 %VO <sub>2</sub> p                     | TM, CE                 | Cont               | CL   | N     | N        | N     | 3.60                       |                            |      |
| Iwanaga et al. <sup>50</sup>    | 2005 | (1)                         | 74 (64)   | 59 ± 1       | MI                       | 3     | 4-5                 | A:60                                         | 50-60 %HRR             | Walk, CE, Dance    | Cont | CL    | N        | N     | N                          |                            | 0.20 |
|                                 |      | (2)                         | 62 (58)   | 56 ± 1       | MI                       |       |                     |                                              |                        |                    |      |       |          |       |                            |                            | 0.19 |
|                                 |      | (3)                         | 26 (21)   | 60 ± 2       | MI                       |       |                     |                                              |                        |                    |      |       |          |       |                            |                            | 0.12 |
| Izawa et al. <sup>51</sup>      | 2004 | 82 (63)                     | 62 ± 12   | MI           | 8                        | 2     | W A+R C:60          | 100 %AT                                      | TM                     | Cont               | CL   | N     | Y        | Y     | 5.40                       |                            |      |
| Izawa et al. <sup>52</sup>      | 2010 | (1)                         | 242 (203) | 55 ± 7       | MI CABG VR               | 8     | 2                   | W A+R C:60                                   | 100 %VT                | TM                 | Cont | CL    | N        | Y     | Y                          | 3.20                       |      |
|                                 |      | (2)                         | 200 (163) | 71 ± 3       | MI CABG VR               |       |                     |                                              |                        |                    |      |       |          |       |                            | 1.90                       |      |
| Izawa et al. <sup>53</sup>      | 2011 | (1)                         | 281 (235) | 61 ± 10      | PCI                      | 8     | 2                   | W A+R C:60                                   | 100 %VT                | TM                 | Cont | CL    | N        | Y     | N                          | 3.90                       |      |
|                                 |      | (2)                         | 156 (126) | 63 ± 10      | CABG VR                  |       |                     |                                              |                        |                    |      |       |          |       |                            | 4.20                       |      |
| Joughin et al. <sup>54</sup>    | 1999 | 93 (85)                     | 57 ± 11   | AMI CABG PCI | 26                       | 3     | A:30                | 100 %VT                                      | Walk, CE               | Cont               | NS   | N     | Y        | N     | 2.70                       |                            |      |
| Kalapura et al. <sup>55</sup>   | 2003 | 50 (38)                     | 58 ± 13   | MI           | 12                       | 3     | W:10; A:30-40; C:10 | 70-80 %HRp                                   | Walk, CE, RW           | Cont               | CL   | N     | N        | N     | 2.45                       |                            |      |
| Kelbaek et al. <sup>56</sup>    | 1981 | (1)                         | 14 (14)   | NS           | MI                       | 12    | 3                   | A:30                                         | 100bpm to 70 %HRp      | Walk/Jog, CE, Cali | Cont | CL    | N        | N     | N                          | 3.10                       |      |
|                                 |      | (2)                         | 16 (16)   | NS           | MI                       |       |                     |                                              |                        |                    |      |       |          |       |                            | 0.90                       |      |
| Keteyian et al. <sup>57</sup>   | 2014 | (1)                         | 15 (11)   | 60 ± 7       | MI CABG PCI              | 10    | 3                   | W:5; A:4x4 (R:3); C:4                        | 1:80-90 (R:60-70) %HRR | TM                 | Int  | CL    | N        | N     | Y                          | 3.60                       | 0.28 |
|                                 |      | (2)                         | 13 (12)   | 58 ± 9       | MI CABG PCI              | 10    | 3                   | W:5; A:30; C:5                               | 60-80 %HRR             | TM                 | Cont | CL    | N        | N     | Y                          | 1.70                       | 0.14 |
| Keyser et al. <sup>58</sup>     | 1991 | 10 (9)                      | 58 ± 13   | MI CABG      | 12                       | 3     | W:10; A:30; C:10    | 70-80 %HRR                                   | TM, CE, AE             | Cont               | CL   | N     | N        | N     | 4.55                       | 0.29                       |      |

| Study                            | Year  | Participant characteristics |           |            | Rehabilitation protocols |       |                   |                         |                                     |                   |      |       | Outcomes |       |                             |                             |      |
|----------------------------------|-------|-----------------------------|-----------|------------|--------------------------|-------|-------------------|-------------------------|-------------------------------------|-------------------|------|-------|----------|-------|-----------------------------|-----------------------------|------|
|                                  |       | n (men)                     | Age       | Conditions | Length                   | Freq. | Exercise duration | Intensity               | Mode                                | Type              | Sup. | Prog. | Res.     | Comp. | $\Delta\text{VO}_2\text{R}$ | $\Delta\text{VO}_2\text{A}$ |      |
| Kida et al. <sup>59</sup>        | 2008  | (1)                         | 37 (37)   | 60 ± 10    | MI                       | 12    | 2                 | W A+R C:60              | 100 %AT                             | 'Aerobic'         | Cont | CL    | N        | Y     | N                           | 0.15                        |      |
|                                  |       | (2)                         | 33 (33)   | 61 ± 11    | MI                       |       |                   |                         |                                     |                   |      |       |          |       |                             |                             | 0.41 |
| Kim, C et al. <sup>60</sup>      | 2012  | (1)                         | 16 (14)   | 55 ± 10    | ACS+PCI                  | 6     | 3                 | A:50                    | wk1-2:60, wk3-4:70, wk5-6w:85 %HRR  | TM (power walk)   | Cont | CL    | Y        | N     | N                           | 7.49                        |      |
|                                  |       | (2)                         | 18 (17)   | 59 ± 10    | ACS+PCI                  | 6     | 3                 | A:50                    | wk1-2:60, wk3-4:70, wk5-6w:85 %HRR  | TM (holding rail) | Cont | CL    | Y        | N     | N                           | 2.58                        |      |
| Kim, C et al. <sup>61</sup>      | 2014a | (1)                         | 8 (7)     | 47 ± 11    | PCI                      | 6     | 3                 | W:10; A:30; C:10        | wk1-2:60, wk3-4:70, wk5-6w:85 %HRR  | TM, CE            | Cont | CL    | Y        | N     | Y                           | 7.40                        |      |
|                                  |       | (2)                         | 15 (13)   | 51 ± 12    | PCI                      |       |                   |                         |                                     |                   |      |       |          |       |                             | 4.40                        |      |
| Kim, C et al. <sup>62</sup>      | 2014b |                             | 16 (14)   | 55 ± 10    | PCI                      | 6     | 3                 | W:10; A:30; C:10        | wk1-2:60, wk3-4:70, wk5-6w:85 %HRR  | TM, CE            | Cont | CL    | Y        | N     | Y                           | 2.50                        |      |
| Kim, C et al. <sup>63</sup>      | 2015  | (1)                         | 14 (12)   | 57 ± 12    | MI+PCI                   | 6     | 3                 | W:10; A:4x4 (R:3); C:10 | 1:85-95 (R:50-70) %HRR              | TM                | Int  | CL    | N        | N     | N                           | 6.46                        |      |
|                                  |       | (2)                         | 14 (10)   | 60 ± 14    | MI+PCI                   | 6     | 3                 | W:10; A:25; C:10        | 70-85 %HRR                          | TM                | Cont | CL    | N        | N     | N                           | 2.47                        |      |
| Kim, H-J et al. <sup>64</sup>    | 2013  |                             | 17 (NS)   | 56 ± 7     | PCI                      | 6     | NS                | W:10; A:30; C:10        | wk1-2:60, wk3-4:70, wk5-6:85 %HRR   | TM, CE            | Cont | CL    | Y        | N     | N                           | 4.37                        |      |
| Kim, Y-J et al. <sup>65</sup>    | 2008  |                             | 29 (20)   | 60 ± 2     | MI PCI                   | 6     | 3                 | A:30-40                 | 50-85 %VO <sub>2</sub> p            | TM, CE            | Cont | CL    | N        | N     | Y                           | 4.20                        |      |
| Kirwan et al. <sup>66</sup>      | 2003  | (1)                         | 18 (0)    | 58. ± 1    | MI CABG PCI              | 12    | 5                 | W:10; A:45-60; C:10     | 65-75 %VO <sub>2</sub> p            | Walk              | Cont | CL/H  | Y        | N     | N                           | 1.13                        |      |
|                                  |       | (2)                         | 20 (0)    | 65 ± 1     | MI CABG PCI              |       |                   |                         |                                     |                   |      |       |          |       |                             | 0.42                        |      |
| Koba et al. <sup>67</sup>        | 2015  |                             | 57 (49)   | 64 ± 12    | MI                       | 26    | NS                | A:30                    | 40-60 %HRR, 100%VT, RPE 12-13       | CE                | Cont | CL    | N        | N     | N                           | 2.40                        |      |
| Kodis et al. <sup>68</sup>       | 2001  | (1)                         | 713 (612) | 61 ± 9     | CABG                     | 26    | 2                 | NS                      | 40-70 %'functional capacity'        | TM, CE, AE        | Cont | CL    | N        | Y     | N                           | 3.26                        | 0.28 |
|                                  |       | (2)                         | 329 (296) | 62 ± 9     | CABG                     | 26    | 3-5               | NS                      | 40-70 %'functional capacity'        | Walk              | Cont | H     | N        | N     | N                           | 2.94                        | 0.22 |
| Korzen-Kuba et al. <sup>69</sup> | 2010  |                             | 32 (32)   | 55 ± 8     | MI                       | 18    | 2-3               | A:40                    | 80% HRp                             | CE, Gym           | Mix  | CL    | N        | N     | N                           | 2.13                        |      |
| Kraal et al. <sup>70</sup>       | 2014  | (1)                         | 25 (21)   | 56 ± 9     | PCI CABG                 | 12    | 2                 | A:45-60                 | 70-85 %HRp                          | TM, CE            | Cont | CL    | N        | N     | N                           | 2.40                        |      |
|                                  |       | (2)                         | 25 (22)   | 61 ± 8     | PCI CABG                 | 12    | 2                 | A:45-60                 | 70-85 %HRp                          | TM, CE            | Cont | CL/H  | N        | N     | N                           | 3.20                        |      |
| Lan et al. <sup>71</sup>         | 2002  | (1)                         | 24 (24)   | 51 ± 10    | PCI                      | 12    | 3                 | W:5; A:20; C:5          | 100 %VT, RPE 12-13                  | TM, CE            | Cont | CL    | N        | N     | N                           | 3.40                        |      |
|                                  |       | (2)                         | 20 (20)   | 58 ± 7     | CABG                     |       |                   |                         |                                     |                   |      |       |          |       |                             | 6.50                        |      |
| Lavie et al. <sup>72</sup>       | 2006  | (1)                         | 104 (76)  | 48 ± 6     | MI CABG PCI              | 12    | 3                 | W:10; A:30-40; C:10     | 100 %VT, RPE 12-13                  | TM, CE            | Cont | CL    | N        | N     | Y                           | 2.30                        |      |
|                                  |       | (2)                         | 260 (175) | 75 ± 3     | MI CABG PCI              |       |                   |                         |                                     |                   |      |       |          |       |                             | 1.00                        |      |
| Lazzeroni et al. <sup>73</sup>   | 2017  | (1)                         | 39 (37)   | 59 ± 10    | MI CABG PCI              | 10    | 2-3               | W:10, A:30, C:10        | 40-80% VO <sub>2</sub> p            | CE                | Cont | CL    | N        | N     | N                           | 5.4                         |      |
|                                  |       | (2)                         | 51 (45)   | 60 ± 11    | MI CABG PCI              |       |                   |                         |                                     |                   |      |       |          |       |                             | -0.10                       |      |
| Lee et al. <sup>74</sup>         | 2008  |                             | 20 (20)   | 52 ± 7     | MI                       | 12    | 3                 | W:5; A:20; C:5          | 55-70 %VO <sub>2</sub> p, RPE 12-13 | CE                | Cont | CL    | N        | N     | N                           | 2.80                        |      |

| Study                           | Year | Participant characteristics |           |             | Rehabilitation protocols |       |                         |                           |                                         |                   |      |       | Outcomes |       |                             |                             |      |
|---------------------------------|------|-----------------------------|-----------|-------------|--------------------------|-------|-------------------------|---------------------------|-----------------------------------------|-------------------|------|-------|----------|-------|-----------------------------|-----------------------------|------|
|                                 |      | n (men)                     | Age       | Conditions  | Length                   | Freq. | Exercise duration       | Intensity                 | Mode                                    | Type              | Sup. | Prog. | Res.     | Comp. | $\Delta\text{VO}_2\text{R}$ | $\Delta\text{VO}_2\text{A}$ |      |
| Lee et al. <sup>75</sup>        | 2017 | 72 (72)                     | 55 ± 8    | MI PCI      | 8                        | 3     | W:10, A:45, C:5         | Wk1-4: 40, wk5-8: 80 %HRR | TM                                      | Cont              | CL   | Y     | N        | Y     | 3.40                        |                             |      |
| Leitch et al. <sup>76</sup>     | 1997 | 26 (19)                     | 56 ± 1    | MI          | 6                        | 3-4   | A:wk1-12:30, wk13-26:60 | 70 %HRp                   | NS                                      | Cont              | CL   | N     | N        | N     | NS                          |                             |      |
| Lim et al. <sup>77</sup>        | 2016 | (1)                         | 170 (147) | 54 ± 10     | MI                       | 6     | 3                       | W:10, A:30, C:10          | 40-85 % HRR                             | NS                | Cont | CL/H  | N        | N     | N                           | 1.56                        |      |
|                                 |      | (2)                         | 189 (149) | 59 ± 12     | MI                       |       |                         |                           |                                         |                   |      |       |          |       |                             | 1.93                        |      |
| Messin et al. <sup>78</sup>     | 1977 | 14 (13)                     | 52 ± 8    | MI          | 6                        | 3     | W:7; A:4x2 (R:3)        | I:90-100 (R:60) %MWC      | CE                                      | Int               | CL   | N     | N        | N     |                             | 0.14                        |      |
| Mifkova et al. <sup>79</sup>    | 2010 | (1)                         | 25 (25)   | 61 ± 10     | MI                       | 12    | 3                       | W:10; A:25; C:10          | 100 %AT                                 | CE                | Cont | CL    | N        | N     | N                           | 2.40                        |      |
|                                 |      | (2)                         | 24 (24)   | 58 ± 11     | MI                       |       |                         |                           |                                         |                   |      |       |          |       |                             | 5.30                        |      |
| Milani et al. <sup>80</sup>     | 1996 | (1)                         | 69 (54)   | 61 ± 11     | MI CABG PCI              | 12    | 3                       | W:10; A:30-40, C:10       | 70-85 %HRp                              | Walk/Jog, CE, RW  | Cont | CL    | Y        | Y     | Y                           | 8.75                        |      |
|                                 |      | (2)                         | 269 (210) | 64 ± 11     | MI CABG PCI              |       |                         |                           |                                         |                   |      |       |          |       |                             | 7.35                        |      |
| Milani et al. <sup>81</sup>     | 1998 | 500 (400)                   | 63 ± 11   | MI CABG PCI | 12                       | 3     | W:10; A:30-40; C:10     | 70-85 %HRp                | Walk/Jog, CE, RW                        | Cont              | CL   | Y     | Y        | Y     | 2.50                        | 0.19                        |      |
| Milani et al. <sup>82</sup>     | 2009 | (1)                         | 53 (39)   | 60 ± 12     | MI CABG PCI              | 12    | 3                       | W:10; A:30; C:10          | 70-85 %HRp                              | Walk/Jog, CE, RW  | Cont | CL    | Y        | Y     | Y                           | 1.60                        |      |
|                                 |      | (2)                         | 469 (342) | 65 ± 10     | MI CABG PCI              |       |                         |                           |                                         |                   |      |       |          |       |                             | 2.40                        |      |
| Mimura et al. <sup>83</sup>     | 2005 | 15 (NS)                     | 54 ± 11   | MI          | 4                        | 4     | A:40                    | 60 %HRp                   | Walk                                    | Cont              | H    | N     | N        | N     | 1.70                        |                             |      |
| Moholdt et al. <sup>84</sup>    | 2009 | (1)                         | 28 (24)   | 60.2 ± 7    | CABG                     | 4     | 5                       | W:8, A:4x4 (R:3); C:5     | I:90 (R:70) %HRp                        | TM                | Int  | CL    | N        | N     | N                           | 3.30                        |      |
|                                 |      | (2)                         | 31 (24)   | 62 ± 8      | CABG                     | 4     | 5                       | W:8; A:46; C:5            | 70 %HRp                                 | TM                | Cont | CL    | N        | N     | N                           | 2.30                        |      |
| Moholdt et al. <sup>85</sup>    | 2011 | (1)                         | 59 (49)   | 58 ± 9      | MI                       | 12    | 3                       | W:10; A:35; C:5           | 'vigorous encouraged'                   | Circuit           | Cont | CL/H  | N        | N     | N                           | 2.50                        |      |
|                                 |      | (2)                         | 30 (25)   | 57 ± 10     | MI                       | 12    | 3                       | W:8; A:4x4 (R:3); C:5     | I:85-95 (R:70) %HRp                     | TM                | Int  | CL    | N        | N     | N                           | 4.60                        |      |
| Moholdt et al. <sup>86</sup>    | 2012 | (1)                         | 16 (13)   | 64 ± 7      | CABG                     | 4     | 3                       | NS                        | s1-4:<11, s5-20:12-14, s20-30:15-17 RPE | Unclear           | Cont | CL    | Y        | Y     | Y                           | 2.90                        | 0.22 |
|                                 |      | (2)                         | 14 (11)   | 62 ± 8      | CABG                     | 4     | 3                       | W:10; A:4x4 (R:3)         | I:85-95 (R:70) %HRp                     | 'Home activities' | Int  | H     | N        | N     | N                           | 3.90                        | 0.37 |
| Morris et al. <sup>87</sup>     | 1993 | 142 (129)                   | 57 ± NS   | MI CABG PCI | 26                       | 3     | NS                      | 70-80 %HRp                | NS                                      | Cont              | CL   | N     | N        | N     | 3.84                        |                             |      |
| Motohiro et al. <sup>88</sup>   | 2005 | 44 (NS)                     | 57 ± 8    | MI          | 3                        | 5     | A:60                    | 70 %VO2p                  | TM, CE                                  | Cont              | CL   | N     | N        | N     | 1.80                        |                             |      |
| Mourot et al. <sup>89</sup>     | 2010 | 614 (520)                   | 57 ± 10   | MI CABG PCI | 6                        | 5     | W:5; A:45; C:5          | 100 %VT                   | TM                                      | Cont              | CL   | N     | Y        | Y     | 4.50                        |                             |      |
| Munk et al. <sup>90</sup>       | 2009 | 20 (17)                     | 57 ± 14   | PCI         | 26                       | 3     | W:10; A:4x4 (R:3); C:5  | I:80-90 (R:60-70) %HRp    | TM, CE                                  | Int               | CL   | N     | Y        | N     | 3.90                        | 0.19                        |      |
| Nieuwland et al. <sup>91</sup>  | 1998 | (1)                         | 18 (18)   | 53 ± 7      | MI CS                    | 6     | 5                       | W:5; A:15; C:5 x2         | 60-70 %HRR                              | CE                | Cont | CL    | N        | N     | N                           | 4.75                        |      |
|                                 |      | (2)                         | 20 (20)   | 48 ± 9      | MI CS                    | 6     | 3                       | W:10; A:20; C:5           | 60-70 %HRR                              | Walk, CE          | Cont | CL    | N        | N     | N                           | 4.69                        |      |
| Nieuwland et al. <sup>92</sup>  | 2000 | (1)                         | 63 (52)   | 52 ± 9      | MI CABG PCI              | 6     | 10                      | W:6; A:65-80: C:4         | 60-70 %HRR                              | CE, Games         | Cont | CL    | N        | N     | Y                           | 3.30                        |      |
|                                 |      | (2)                         | 67 (62)   | 53 ± 9      | MI CABG PCI              | 6     | 2                       | W:6; A:65-80: C:4         | 60-70 %HRR                              | CE, Games         | Cont | CL    | N        | N     | Y                           | 2.70                        |      |
| Nordrehaug et al. <sup>93</sup> | 1989 | 27 (26)                     | 55 ± 7    | MI          | 4                        | 5     | A:180-240               | >80 %HRp                  | Walk/Jog, CE, Swim, Cali                | Mix               | CL   | N     | Y        | N     | 4.60                        |                             |      |



| Study                           | Year | Participant characteristics |           |            | Rehabilitation protocols |       |                   |                       |                                      |                            |      |       | Outcomes |       |                             |                             |      |
|---------------------------------|------|-----------------------------|-----------|------------|--------------------------|-------|-------------------|-----------------------|--------------------------------------|----------------------------|------|-------|----------|-------|-----------------------------|-----------------------------|------|
|                                 |      | n (men)                     | Age       | Conditions | Length                   | Freq. | Exercise duration | Intensity             | Mode                                 | Type                       | Sup. | Prog. | Res.     | Comp. | $\Delta\text{VO}_2\text{R}$ | $\Delta\text{VO}_2\text{A}$ |      |
| Omiya et al. <sup>94</sup>      | 2015 | (1)                         | 23 (19)   | 57 ± 13    | MI                       | 12    | 2                 | A:60                  | 100 %AT                              | TM                         | Cont | CL    | N        | Y     | N                           | 3.30                        |      |
|                                 |      | (2)                         | 23 (18)   | 62 ± 7     | MI                       |       |                   |                       |                                      |                            |      |       |          |       |                             | 4.90                        |      |
|                                 |      | (3)                         | 24 (21)   | 61 ± 10    | MI                       |       |                   |                       |                                      |                            |      |       |          |       |                             | 2.50                        |      |
| Onishi et al. <sup>95</sup>     | 2009 |                             | 32 (29)   | 66 ± 10    | CABG                     | 26    | 1-2               | W A C: 60             | 100 %VT, RPE 11-13                   | TM, CE, Indoor Walk        | Cont | CL    | N        | Y     | Y                           | 5.00                        |      |
| Osterhues et al. <sup>96</sup>  | 1988 |                             | 7 (6)     | 59 ± 7     | MI CABG                  | 12    | 3                 | W:10; A:40; C:10      | 60-80 %VO <sub>2</sub> p             | 'aerobic'                  | Cont | CL    | N        | N     | N                           |                             | 0.38 |
| Oya et al. <sup>97</sup>        | 1999 |                             | 16 (14)   | 59 ± 7     | MI                       | 2     | 14                | A:30                  | 100 %AT                              | CE                         | Cont | CL    | N        | N     | N                           | 2.20                        |      |
| Pardaens et al. <sup>98</sup>   | 2014 | (1)                         | 46 (NS)   | NS         | MVR                      | 16    | 2-3               | A:35                  | 100 %AT                              | TM, CE                     | Cont | CL    | N        | Y     | N                           | 5.00                        |      |
|                                 |      | (2)                         | 27 (NS)   | NS         | MVR                      |       |                   |                       |                                      |                            |      |       |          |       |                             | 2.00                        |      |
|                                 |      | (3)                         | 38 (NS)   | NS         | AVR                      |       |                   |                       |                                      |                            |      |       |          |       |                             | 6.00                        |      |
|                                 |      | (4)                         | 33 (NS)   | NS         | AVR                      |       |                   |                       |                                      |                            |      |       |          |       |                             | 4.00                        |      |
| Pavia et al. <sup>99</sup>      | 1995 | (1)                         | 14 (13)   | 59 ± 8     | MI                       | 12    | 2                 | W:5; A:25; C:5        | 100 %VT                              | CE                         | Cont | CL    | N        | N     | N                           | 4.50                        | 0.34 |
|                                 |      | (2)                         | 13 (11)   | 56 ± 9     | MI                       |       |                   |                       |                                      |                            |      |       |          |       |                             | 3.80                        | 0.29 |
| Ribeiro et al. <sup>100</sup>   | 2012 |                             | 20 (18)   | 54 ± 11    | MI                       | 8     | 3                 | W:10; A:35; C:10      | 65-75 %HRp                           | CE                         | Cont | CL    | N        | N     | N                           | 3.10                        | 0.18 |
| Rogmo et al. <sup>101</sup>     | 2004 | (1)                         | 8 (6)     | 63 ± 11    | MI CABG PCI              | 10    | 3                 | W:5; A:4x4 (R:3); C:3 | 1:80-90 (R:50-60) %VO <sub>2</sub> p | Incline TM                 | Int  | CL    | N        | N     | N                           | 6.00                        | 0.45 |
|                                 |      | (2)                         | 9 (8)     | 61 ± 7     | MI CABG PCI              | 10    | 3                 | A:41                  | 50-60 %VO <sub>2</sub> p             | Incline TM                 | Cont | CL    | N        | N     | N                           | 2.70                        | 0.20 |
| Rossi et al. <sup>102</sup>     | 1979 | (1)                         | 20 (19)   | 52 ± 10    | MI                       | 8     | 14                | A:30                  | 80-90 %HRp                           | Walk, CE, Cali             | Cont | CL    | N        | N     | N                           | 2.00                        |      |
|                                 |      | (2)                         | 20 (19)   | 54 ± 6     | MI                       |       |                   |                       |                                      |                            |      |       |          |       |                             | 3.00                        |      |
| Sakuragi et al. <sup>103</sup>  | 2003 |                             | 232 (197) | 61 ± 9     | MI                       | 12    | 3-5               | A:50                  | 50-60 %HRR                           | Walk, CE, Dance            | Cont | CL    | N        | N     | N                           |                             | 0.13 |
| Salveti et al. <sup>104</sup>   | 2008 |                             | 19 (14)   | 53 ± 8     | MI                       | 12    | 3                 | A:30                  | 60-80 %HRp                           | Walk                       | Cont | H     | N        | N     | N                           | 2.90                        |      |
| Savage et al. <sup>105</sup>    | 2009 |                             | 385 (308) | 65 ± 10    | MI CABG PCI              | 12    | 3                 | A:54                  | 70-85 %HRp, RPE 12-14                | TM, CE, AE, RW, Step, Elip | Cont | CL    | N        | Y/N   | N                           | 2.90                        |      |
| Savage et al. <sup>106</sup>    | 2015 | (1)                         | 73 (NS)   | NS         | VR                       | 12    | 3                 | A:45-60               | 70-85 %HRp, RPE 12-14                | TM, CE, AE, RW, Step, Elip | Cont | CL    | N        | Y     | N                           | 3.50                        |      |
|                                 |      | (2)                         | 29 (NS)   | NS         | VR+CABG                  |       |                   |                       |                                      |                            |      |       |          |       |                             | 2.90                        |      |
|                                 |      | (3)                         | 211 (NS)  | NS         | CABG                     |       |                   |                       |                                      |                            |      |       |          |       |                             | 3.40                        |      |
| Sumide et al. <sup>107</sup>    | 2009 | (1)                         | 28 (22)   | 56 ± 13    | VR                       | 26    | 1-2               | A:60                  | 100 %AT                              | TM, CE                     | Cont | CL    | N        | Y     | N                           | 8.30                        |      |
|                                 |      | (2)                         | 42 (40)   | 61 ± 8     | CABG                     |       |                   |                       |                                      |                            |      |       |          |       |                             | 6.60                        |      |
|                                 |      | (3)                         | 34 (28)   | 60 ± 11    | MI                       |       |                   |                       |                                      |                            |      |       |          |       |                             | 5.30                        |      |
| Suskin et al. <sup>108</sup>    | 2007 |                             | 29 (NS)   | 66 ± 7     | MI CABG PCI              | 12    | 4                 | W:5; A:40; C:5        | 75 %HRp                              | TM, CE                     | Cont | H     | N        | N     | N                           | NS                          |      |
| Suzuki et al. <sup>109</sup>    | 2005 | (1)                         | 22 (20)   | 57 ± 11    | MI CABG PCI              | 12    | 3-5               | A:50-80               | 50-60 %HRR, RPE 13                   | Walk                       | Cont | CL/H  | N        | N     | Y                           | 2.80                        |      |
|                                 |      | (2)                         | 22 (17)   | 59 ± 9     | MI CABG PCI              |       |                   |                       |                                      |                            |      |       |          |       |                             | 3.20                        |      |
| Svacinova et al. <sup>110</sup> | 2008 |                             | 45 (NS)   | 61 ± 8     | MI PCI                   | 12    | 3                 | W:10; A:20; C:10      | 100 %AT                              | CE                         | Cont | CL    | N        | Y     | N                           | 2.00                        | 0.13 |

| Study                           | Year | Participant characteristics |          |             | Rehabilitation protocols |       |                   |                        |                          |                      |      |       | Outcomes |       |                            |                            |  |
|---------------------------------|------|-----------------------------|----------|-------------|--------------------------|-------|-------------------|------------------------|--------------------------|----------------------|------|-------|----------|-------|----------------------------|----------------------------|--|
|                                 |      | n (men)                     | Age      | Conditions  | Length                   | Freq. | Exercise duration | Intensity              | Mode                     | Type                 | Sup. | Prog. | Res.     | Comp. | $\Delta$ VO <sub>2</sub> R | $\Delta$ VO <sub>2</sub> A |  |
| Szmedra et al. <sup>111</sup>   | 1994 | 7 (5)                       | 55 ± 10  | MI CABG PCI | 6                        | 3     | W:10; A:30; C:10  | 70%VO <sub>2</sub> p   | TM, CE, AE, RW           | Cont                 | CL   | N     | N        | N     | 1.90                       |                            |  |
| Takaya et al. <sup>112</sup>    | 2014 | 348 (283)                   | 62 ± 10  | MI          | 12                       | 2     | A:30-60           | 50-60 %HRR, RPE 12-13  | Walk, CE, Cali           | Cont                 | CL/H | N     | N        | Y     | 2.40                       |                            |  |
| Tanabe et al. <sup>113</sup>    | 1998 | 18 (18)                     | 56 ± 9   | MI          | 8                        | 3     | W:5; A:20; C:5    | 100 %AT                | TM                       | Cont                 | CL   | N     | N        | N     | 4.20                       |                            |  |
| Temfemo et al. <sup>114</sup>   | 2011 | (1)                         | 22 (NS)  | 60 ± 11     | PCI                      | 8     | 3                 | A:45                   | 100 %VT                  | CE                   | Cont | CL    | N        | N     | N                          | 2.00                       |  |
|                                 |      | (2)                         | 62 (NS)  | 63 ± 12     | CABG                     |       |                   |                        |                          |                      |      |       |          |       |                            | 2.00                       |  |
|                                 |      | (3)                         | 54 (NS)  | 58 ± 15     | MI                       |       |                   |                        |                          |                      |      |       |          |       |                            | 2.00                       |  |
|                                 |      | (4)                         | 50 (NS)  | 63 ± 14     | VR                       |       |                   |                        |                          |                      |      |       |          |       |                            | 2.00                       |  |
| Tsai et al. <sup>115</sup>      | 2005 | 15 (NS)                     | 61 ± 10  | CABG        | 12                       | 3     | A:30-40           | 60-85 %HRp             | TM, CE                   | Cont                 | CL   | N     | N        | N     | NS                         |                            |  |
| Uchida et al. <sup>116</sup>    | 2002 | 20 (20)                     | 60 ± 10  | MI          | 12                       | 5     | A:60              | 50-60 %HRR             | Walk, CE, Dance          | Cont                 | CL/H | N     | N        | N     | 4.80                       | 0.30                       |  |
| Ueshima et al. <sup>117</sup>   | 2005 | 53 (36)                     | 65 ± 10  | MI          | 26                       | 2-3   | NS                | 90 %AT                 | NS                       | Cont                 | CL   | N     | N        | N     | 4.20                       |                            |  |
| Vanhees et al. <sup>118</sup>   | 1983 | 24 (24)                     | 51 ± 1   | MI          | 12                       | 3     | A:75              | 80 %'maximal capacity' | TM, CE, RW               | Cont                 | CL   | N     | N        | N     |                            | 0.64                       |  |
| Vanhees et al. <sup>119</sup>   | 2004 | (1)                         | 347 (NS) | NS          | CABG                     | 12    | 3                 | A:90                   | 60-90 %HRR               | TM, CE, AE, RW, Cali | Cont | CL    | Y        | N     | N                          | 0.44                       |  |
|                                 |      | (2)                         | 307 (NS) | NS          | MI+CABG                  |       |                   |                        |                          |                      |      |       |          |       |                            | 0.43                       |  |
|                                 |      | (3)                         | 767 (NS) | NS          | MI                       |       |                   |                        |                          |                      |      |       |          |       |                            | 0.43                       |  |
|                                 |      | (4)                         | 69 (NS)  | NS          | VR                       |       |                   |                        |                          |                      |      |       |          |       |                            | 0.39                       |  |
|                                 |      | (5)                         | 194 (NS) | NS          | PCI                      |       |                   |                        |                          |                      |      |       |          |       |                            | 0.32                       |  |
| Vysoky et al. <sup>120</sup>    | 2015 | 106 (90)                    | 60 ± 11  | ACE         | 8                        | 3     | W:15; A:60; C:15  | 100 %VT                | TM, CE, RW               | Cont                 | CL   | N     | Y        | N     | 2.90                       |                            |  |
| Wilmore et al. <sup>121</sup>   | 1990 | (1)                         | 17 (17)  | 54 ± 11     | MI                       | 26    | 3                 | A:45-60                | 60-75 %VO <sub>2</sub> p | TM, CE, AE           | Cont | CL    | N        | N     | N                          | 4.30                       |  |
|                                 |      | (2)                         | 17 (17)  | 54 ± 12     | MI                       |       |                   |                        |                          |                      |      |       |          |       |                            | 2.40                       |  |
| Wu et al. <sup>122</sup>        | 2006 | (1)                         | 18 (NS)  | 63 ± 7      | CABG                     | 12    | 3                 | W:10; A:30-60; C:10    | 60-85 %HRp               | TM, CE               | Cont | CL    | N        | N     | N                          | 8.50                       |  |
|                                 |      | (2)                         | 18 (NS)  | 61 ± 8      | CABG                     | 12    | 3                 | W:10; A:30-60; C:10    | 60-85 %HRp, RPE 11-13    | Walk                 | Cont | H     | N        | N     | N                          | 6.50                       |  |
| Wu et al. <sup>123</sup>        | 2012 | 28 (23)                     | 60 ± 9   | CABG        | 12                       | 3     | W:5; A:30; C:5    | 60 %HRR                | TM                       | Cont                 | CL   | N     | N        | N     | 1.70                       |                            |  |
| Yamamoto et al. <sup>124</sup>  | 1998 | (1)                         | 20 (NS)  | 61 ± 14     | MI                       | 8     | 3                 | W:5; A:30; C:5         | 100 %AT                  | TM                   | Cont | CL    | N        | N     | N                          | 1.80                       |  |
|                                 |      | (2)                         | 15 (NS)  | 60 ± 10     | MI                       |       |                   |                        |                          |                      |      |       |          |       |                            | 2.20                       |  |
| Yoshida et al. <sup>125</sup>   | 1999 | 17 (NS)                     | 57 ± 11  | MI          | 4                        | 28-35 | A:20-40           | 80-100 %VT             | Walk, CE                 | Cont                 | CL   | N     | N        | Y     | 4.00                       |                            |  |
| Zanettini et al. <sup>126</sup> | 2011 | (1)                         | 35 (35)  | 61 ± 9      | CABG                     | 5     | 3                 | W:5; A:30; C:5         | RPE 4-5 (CR10)           | CE                   | Cont | CL    | N        | N     | Y                          | 2.00                       |  |
|                                 |      | (2)                         | 36 (36)  | 64 ± 9      | CABG                     | 5     | 3                 | W:5; A:30; C:5         | 100 %AT                  | CE                   | Cont | CL    | N        | N     | Y                          | 2.40                       |  |
| Zbinden et al. <sup>127</sup>   | 2007 | 24 (20)                     | 60 ± 9   | MI          | 12                       | 3     | A:60              | 80 %VO <sub>2</sub> p  | Jog, CE                  | Cont                 | CL   | N     | N        | N     | 2.20                       |                            |  |
| Zheng et al. <sup>128</sup>     | 2008 | 27 (NS)                     | NS       | MI          | 26                       | 3     | W:15; A:30; C:15  | 100 %AT                | CE                       | Cont                 | CL   | N     | N        | N     | 3.10                       |                            |  |

NS, not stated/missing. For references, see Supplementary Material 4.

**Study/Year:** Value in parentheses denotes group number for studies with ≥2 exercise groups.

**Participant characteristics:** n(men) presented as sample size (number of men). Age presented as mean ± SD years. Conditions: MI, myocardial infarction; CABG, coronary artery bypass graft; PCI, percutaneous coronary intervention; ACE, acute coronary event; VR, valvular repair/replacement; ACS, acute coronary syndrome; AVR/MVR, atrial/mitral valve repair/replacement.

**Rehabilitation protocols:** Length presented as no. of weeks. Frequency (Freq.) presented as sessions per week. Exercise Duration presented as minutes per session: W, warm-up; A: aerobic component (interval programs presented as interval x duration); C, cool-down; R, recovery, wk, week. Intensity: %HRp, % peak heart rate; %HRR, % heart rate reserve; %VO<sub>2p</sub>, % peak oxygen uptake; %AT/VT, % of anaerobic/ventilatory threshold; %WRp, % peak work rate; %MWC, % maximal work capacity; RPE, rating of perceived exertion; BB, beta-blocked patients; I, interval; R, recovery; s, session. Mode: TM, treadmill; CE, cycle ergometer; RW, rowing ergometer; AE, arm ergometer; Tramp, trampoline; Cali, calisthenics; Gym, gymnastics; Elip, elliptical trainer. Type: Cont, continuous training; Int, interval training; Mix, mixed continuous/interval training. Supervision (Sup.), level of monitoring/supervision: CL, clinic-based; H, home-based. Progressive (Prog.), whether aerobic exercise intensity was re-evaluated during the program: Y, yes; N, no. Resistance exercises (Res.): Y, yes; N, no. Comprehensive rehabilitation (Comp.), exercise training plus education and risk factor management: Y, yes; N, No.

**Outcomes:**  $\Delta\dot{V}O_2R$ , change in relative  $\dot{V}O_2$  peak (presented as mL·kg<sup>-1</sup>·min<sup>-1</sup>);  $\Delta\dot{V}O_2A$ , change in absolute  $\dot{V}O_2$  peak (presented as L·min<sup>-1</sup>).

**Supplementary Material 4.** List of references for included studies.

1. Aamot IL, Forbord SH, Gustad K, et al. Home-based versus hospital-based high-intensity interval training in cardiac rehabilitation: a randomized study. *Eur J Prev Cardiol* 2014;21(9):1070-78. doi: 10.1177/2047487313488299
2. Aamot IL, Moholdt T, Amundsen BH, et al. Onset of exercise training 14 days after uncomplicated myocardial infarction: A randomized controlled trial. *Eur J Cardiovasc Prev Rehabil* 2010;17(4):387-92. doi: 10.1097/HJR.0b013e328333edf9
3. Ades PA, Grunvald MH, Weiss RM, et al. Usefulness of myocardial ischemia as predictor of training effect in cardiac rehabilitation after acute myocardial infarction or coronary artery bypass grafting. *Am J Cardiol* 1989;63(15):1032-36. doi: 10.1016/0002-9149%2889%2990073-8
4. Ades PA, Waldmann ML, Polk DM, et al. Referral patterns and exercise response in the rehabilitation of female coronary patients aged greater than or equal to 62 years. *Am J Cardiol* 1992;69(17):1422-5.
5. Ades PA, Waldmann ML, Gillespie C. A controlled trial of exercise training in older coronary patients. *J Gerontol - Ser A Biol Sci Med Sci* 1995;50 A(1):M7-M11.
6. Ades PA, Maloney A, Savage P, et al. Determinants of physical functioning in coronary patients - Response to cardiac rehabilitation. *Arch Intern Med* 1999;159(19):2357-60. doi: 10.1001/archinte.159.19.2357
7. Akashi YJ, Koike A, Osada N, et al. Short-term physical training improves vasodilatory capacity in cardiac patients. *Jpn Heart J* 2002;43(1):13-24. doi: 10.1536/jhj.43.13
8. Arak-Lukmann A, Zilmer M, Maaros J, et al. Oxidative stress before and after exercise conditioning in patients following surgical revascularization of the myocardium. *Int J Rehabil Res* 2002;25(4):305-12. doi: 10.1097/00004356-200212000-00008
9. Arthur HM, Smith KM, Kodis J, et al. A controlled trial of hospital versus home-based exercise in cardiac patients. *Med Sci Sports Exerc* 2002;34(10):1544-50.
10. Arvan S. Exercise performance of the high risk acute myocardial infarction patient after cardiac rehabilitation. *Am J Cardiol* 1988;62(4):197-201.
11. Balsam P, Glowczynska R, Zaczek R, et al. The effect of cycle ergometer exercise training on improvement of exercise capacity in patients after myocardial infarction. *Kardiol Pol* 2013;71(10):1059-64. doi: 10.5603/kp.2013.0261
12. Belardinelli R, Paolini I, Cianci G, et al. Exercise training intervention after coronary angioplasty: The ETICA trial. *J Am Col Cardiol* 2001;37(7):1891-900. doi: 10.1016/S0735-1097%2801%2901236-0
13. Benetti M, De Araujo CLP, Dos Santos RZ. Cardiorespiratory fitness and quality of life at different exercise intensities after myocardial infarction. *Arq Bras Cardiol* 2010;95(3):399-404. doi: 10.1590/S0066-782X2010005000089
14. Bilinska M, Kosydar-Piechna M, Gasiorowska A, et al. Influence of dynamic training on hemodynamic, neurohormonal responses to static exercise and on inflammatory markers in patients after coronary artery bypass grafting. *Circ J* 2010;74(12):2598-604. doi: 10.1253/circj.CJ-10-0104
15. Bilinska M, Kosydar-Piechna M, Mikulski T, et al. Influence of aerobic training on neurohormonal and hemodynamic responses to head-up tilt test and on autonomic nervous activity at rest and after exercise in patients after bypass surgery. *Cardiol J* 2013;20(1):17-24. doi: 10.5603/CJ.2013.0004
16. Blumenthal JA, Rejeski WJ, Walsh-Riddle M, et al. Comparison of high- and low-intensity exercise training early after acute myocardial infarction. *Am J Cardiol* 1988;61(1):26-30.

17. Cesari F, Marcucci R, Gori AM, et al. Impact of a cardiac rehabilitation program and inflammatory state on endothelial progenitor cells in acute coronary syndrome patients. *Int J Cardiol* 2013;167(5):1854-59. doi: 10.1016/j.ijcard.2012.04.157
18. Choo J, Burke LE, Pyo Hong K. Improved quality of life with cardiac rehabilitation for post-myocardial infarction patients in Korea. *Eur J Cardiovasc Nur* 2007;6(3):166-71. doi: 10.1016/j.ejcnurse.2006.07.004
19. Chuang T, Sung W, Lin C. Application of a virtual reality-enhanced exercise protocol in patients after coronary bypass. *Arch Phys Med Rehabil* 2005;86(10):1929-32.
20. Chludilova V, Mifkova L, Pochmonova J, et al. Functional capacity in men after coronary artery bypass surgery influenced by physical training. *Scripta Medica Facultatis Medicae Universitatis Brunensis Masarykianae* 2007;80(5):203-10.
21. Chung CC, Huang WC, Chiou KR, et al. Ratio of early mitral inflow peak velocity to flow propagation velocity predicts training effects of cardiac rehabilitation in patients after acute myocardial infarction. *J Rehabil Med* 2010;42(3):232-38.
22. Ciske PE, Dressendorfer RH, Gordon S, et al. Attenuation of exercise training effects in patients taking beta blockers during early cardiac rehabilitation. *Am Heart J* 1986;112(5):1016-25. doi: 10.1016/0002-8703(86)90315-7
23. Cottin Y, Walker P, Rouhier-Marcet I, et al. Relationship between increased peak oxygen uptake and modifications in skeletal muscle metabolism following rehabilitation after myocardial infarction. *J Cardiopulmon Rehabil* 1996;16(3):169-74. doi: 10.1097/00008483-199605000-00004
24. Cottin Y, Verges B, Walker PM, et al. Muscle metabolism assessed by phosphorus-31 nuclear magnetic resonance spectroscopy after myocardial infarction in rehabilitated patients: A 1-year follow-up. *J Cardiopulmon Rehabil* 2000;20(1):44-49.
25. Currie KD, Bailey KJ, Jung ME, et al. Effects of resistance training combined with moderate-intensity endurance or low-volume high-intensity interval exercise on cardiovascular risk factors in patients with coronary artery disease. *J Sci Med Sport* 2015;18(6):637-42. doi: 10.1016/j.jsams.2014.09.013
26. Degre S, Lenaers A, Messin R, et al. Postinfarction exercise capacity after lidoflazine treatment or physical training. *Cardiol* 1979;64(1):35-47.
27. Detry JMR, Rousseau MF, Brasseur LA. Early hemodynamic adaptations to physical training in patients with healed myocardial infarction. *Eur J Cardiol* 1975;2(3):307-13.
28. DeWitt CM, Dressendorfer RH, Hollingsworth V. Aerobic training effects following successful intracoronary streptokinase thrombolysis in acute myocardial infarction. *J Cardiopulmon Rehabil* 1986;6(5):171-76.
29. Dobraszkievicz-Wasilewska B, Mazurek K, Piotrowicz R. Health Benefits of an Interval Training on a Cycle Ergometer Among Patients with Coronary Heart Disease. *Pol J Sports Med* 2009;25(1):41-50.
30. Dressendorfer RH, Smith JL, Hollingsworth V, et al. Propranolol treatment and the effectiveness of exercise training soon after myocardial infarction in patients not limited by exertional symptoms: Improved maximal oxygen uptake and high-density lipoprotein cholesterol. *J Cardiopulmon Rehabil* 1990;10(11):409-17.
31. Dressendorfer RH, Franklin BA, Smith JL, et al. Early cardiac rehabilitation training heart rate based on low-level treadmill testing after myocardial infarction and before hospital discharge. *J Cardiopulmon Rehabil* 1993;13(3):194-200.
32. Dressendorfer RH, Franklin BA, Cameron JL, et al. Exercise training frequency in early post-infarction cardiac rehabilitation. Influence on aerobic conditioning. *J Cardiopulmon Rehabil* 1995;15(4):269-76.

33. Fontes-Carvalho R, Azevedo AI, Sampaio F, et al. The Effect of Exercise Training on Diastolic and Systolic Function After Acute Myocardial Infarction: A Randomized Study. *Medicine (Baltimore)* 2015;94(36):e1450. doi: 10.1097/MD.0000000000001450
34. Fujimoto S, Uemura S, Tomoda Y, et al. Effects of exercise training on the heart rate variability and QT dispersion of patients with acute myocardial infarction. *Jpn Circ J* 1999;63(8):577-82.
35. Ghroubi S, Elleuch W, Abid L, et al. Effects of a low-intensity dynamic-resistance training protocol using an isokinetic dynamometer on muscular strength and aerobic capacity after coronary artery bypass grafting. *Ann Phys Rehabil Med* 2013;56(2):85-101. doi: 10.1016/j.rehab.2012.10.006
36. Giallauria F, Lucci R, De Lorenzo A, et al. Favourable effects of exercise training on N-terminal pro-brain natriuretic peptide plasma levels in elderly patients after acute myocardial infarction. *Ageing* 2006;35(6):601-07. doi: 10.1093/ageing/af1098
37. Giallauria F, Lucci R, Pietrosante M, et al. Exercise-based cardiac rehabilitation improves heart rate recovery in elderly patients after acute myocardial infarction. *J Gerontol Ser A-Biol Sci Med Sci* 2006;61(7):713-17.
38. Giallauria F, Lucci R, D'Agostino M, et al. Two-year multicomprensive secondary prevention program: Favorable effects on cardiovascular functional capacity and coronary risk profile after acute myocardial infarction. *J Cardiovasc Med* 2009;10(10):772-80. doi: 10.2459/JCM.0b013e32832d55fe
39. Giallauria F, Galizia G, Lucci R, et al. Favourable effects of exercise-based Cardiac Rehabilitation after acute myocardial infarction on left atrial remodeling. *Int J Cardiol* 2009;136(3):300-06. doi: 10.1016/j.ijcard.2008.05.026
40. Giallauria F, Cirillo P, D'Agostino M, et al. Effects of exercise training on high-mobility group box-1 levels after acute myocardial infarction. *J Cardiac Failure* 2011;17(2):108-14. doi: 10.1016/j.cardfail.2010.09.001
41. Giallauria F, Acampa W, Ricci F, et al. Exercise training early after acute myocardial infarction reduces stress-induced hypoperfusion and improves left ventricular function. *Eur J Nuc Med Molecul Imag* 2013;40(3):315-24. doi: 10.1007/s00259-012-2302-x
42. Goodman JM, Pallandi DV, Reading JR, et al. Central and peripheral adaptations after 12 weeks of exercise training in post-coronary artery bypass surgery patients. *J Cardiopulmon Rehabil* 1999;19(3):144-50. doi: 10.1097/00008483-199905000-00001
43. Gremeaux V, Deley G, Philipp JL, et al. Does eccentric endurance training improve walking capacity in coronary artery disease patients? A pilot study. *Arch Phys Med Rehabil* 2011;92 (10):1731.
44. Haennel RG, Quinney HA, Kappagoda CT. Effects of hydraulic circuit training following coronary artery bypass surgery. *Med Sci Sports Exerc* 1991;23(2):158-65.
45. Han DS, Hsiao MY, Wang TG, et al. Relation between serum myokines and phase II cardiac rehabilitation. *Medicine* 2017;96(16):e6579. doi: 10.1097/MD.0000000000006579
46. Hansen D, Dendale P, Berger J, et al. The importance of an exercise testing protocol for detecting changes of peak oxygen uptake in cardiac rehabilitation. *Arch Phys Med Rehabil* 2007;88(12):1716-19. doi: 10.1016/j.apmr.2007.07.029
47. Hansen D, Dendale P, Berger J, et al. Importance of exercise training session duration in the rehabilitation of coronary artery disease patients. *Eur J Cardiovasc Prev Rehabil* 2008;15(4):453-59. doi: 10.1097/HJR.0b013e3282fd5c5e
48. Hermes BM, Cardoso DM, Gomes TJN, et al. Short-term inspiratory muscle training potentiates the benefits of aerobic and resistance training in patients undergoing CABG in phase II cardiac rehabilitation program. *Rev Bras Cir Cardiovasc* 2015;30(4):474-81. doi: 10.5935/1678-9741.20150043

49. Hsu CJ, Chen SY, Su S, et al. The effect of early cardiac rehabilitation on health-related quality of life among heart transplant recipients and patients with coronary artery bypass graft surgery. *Trans Proceed* 2011;43(7):2714-17. doi: 10.1016/j.transproceed.2011.04.025
50. Iwanaga Y, Nishi I, Ono K, et al. Angiotensin-converting enzyme genotype is not associated with exercise capacity or the training effect of cardiac rehabilitation in patients after acute myocardial infarction. *Circ J* 2005;69(11):1315-19. doi: 10.1253/circj.69.1315
51. Izawa K, Hirano Y, Yamada S, et al. Improvement in physiological outcomes and health-related quality of life following cardiac rehabilitation in patients with acute myocardial infarction. *Circ J* 2004;68(4):315-20. doi: 10.1253/circj.68.315
52. Izawa KP, Watanabe S, Oka K, et al. Age-Related Differences in Physiologic and Psychosocial Outcomes After Cardiac Rehabilitation. *Am J Phys Med Rehabil* 2010;89(1):24-33. doi: 10.1097/PHM.0b013e3181c5607d
53. Izawa KP, Watanabe S, Oka K, et al. Cardiac rehabilitation outcome following percutaneous coronary intervention compared to cardiac surgery. *Rec Patents Cardiovasc Drug Disc* 2011;6(2):133-39. doi: 10.2174/157489011795933846
54. Joughin HM, Digenio AG, Daly L, et al. Physiological benefits of a prolonged moderate-intensity endurance training programme in patients with coronary artery disease. *S Afr Med J* 1999;89(5):545-50.
55. Kalapura T, Lavie CJ, Jaffrani W, et al. Effects of cardiac rehabilitation and exercise training on indexes of dispersion of ventricular repolarization in patients after acute myocardial infarction. *Am J Cardiol* 2003;92(3):292-94 3p.
56. Kelbaek H, Eskildsen P, Hansen PF, et al. Spontaneous and/or training-induced haemodynamic changes after myocardial infarction. *Int J Cardiol* 1981;1(2):205-13.
57. Keteyian SJ, Hibner BA, Bronsteen K, et al. Greater Improvement in Cardiorespiratory Fitness Using Higher-Intensity Interval Training in the Standard Cardiac Rehabilitation Setting. *J Cardiopulmon Rehabil Prev* 2014;34(2):98-105. doi: 10.1097/hcr.0000000000000049
58. Keyser RE, Leutholtz BC, Moberg CH, et al. Adaptation of asymptomatic patients with coronary heart disease to an intense training stimulus. *J Cardiopulmon Rehabil* 1991;11(6):378-85.
59. Kida K, Osada N, Akashi YJ, et al. The exercise training effects of skeletal muscle strength and muscle volume to improve functional capacity in patients with myocardial infarction. *Int J Cardiol* 2008;129(2):180-86. doi: 10.1016/j.ijcard.2008.04.031
60. Kim C, Kim BO, Lim KB, et al. The Effect of Power-walking in Phase 2 Cardiac Rehabilitation Program. *Ann Rehabil Med* 2012;36(1):133-40. doi: 10.5535/arm.2012.36.1.133
61. Kim C, Jung H, Choi HE, et al. Cardiac rehabilitation after acute myocardial infarction resuscitated from cardiac arrest. *Ann Rehab Med* 2014;38(6):799-804. doi: 10.5535/arm.2014.38.6.799
62. Kim C, Choi HE, Jung H, et al. Impact of aerobic exercise training on endothelial function in acute coronary syndrome. *Ann Rehab Med* 2014;38(3):388-95. doi: 10.5535/arm.2014.38.3.388
63. Kim C, Choi HE, Lim MH. Effect of High Interval Training in Acute Myocardial Infarction Patients with Drug-Eluting Stent. *Am J Phys Med Rehabil* 2015;94(10):S879-86. doi: 10.1097/PHM.0000000000000290
64. Kim HJ, Oh JK, Kim C, et al. Effects of six-week cardiac rehabilitation and exercise on adiponectin in patients with acute coronary syndrome. *Kardiol Pol* 2013;71(9):924-30. doi: 10.5603/kp.2013.0227

65. Kim YJ, Shin YO, Bae JS, et al. Beneficial effects of cardiac rehabilitation and exercise after percutaneous coronary intervention on hsCRP and inflammatory cytokines in CAD patients. *Pflugers Arch* 2008;455(6):1081-88. doi: 10.1007/s00424-007-0356-6
66. Kirwan LD, Mertens DJ, Kavanagh T, et al. Exercise training in women with heart disease: Influence of hormone replacement therapy. *Med Sci Sports Exerc* 2003;35(2):185-92. doi: 10.1249/01.mss.0000048670.61339.68
67. Koba S, Ayaori M, Uto-Kondo H, et al. Beneficial effects of exercise-based cardiac rehabilitation on high-density lipoprotein-mediated cholesterol efflux capacity in patients with acute coronary syndrome. *J Atherosclero Thrombo* 2016;23(7):865-77. doi: 10.5551/jat.34454
68. Kodis J, Smith KM, Arthur HM, et al. Changes in exercise capacity and lipids after clinic versus home-based aerobic training in coronary artery bypass graft surgery patients. *J Cardiopulmon Rehabil* 2001;21(1):31-36.
69. Korzeniowska-Kubacka I, Bilinska M, Michalak E, et al. Influence of exercise training on left ventricular diastolic function and its relationship to exercise capacity in patients after myocardial infarction. *Cardiol J* 2010;17(2):136-42.
70. Kraal JJ, Peek N, Van den Akker-Van Marle ME, et al. Effects of home-based training with telemonitoring guidance in low to moderate risk patients entering cardiac rehabilitation: short-term results of the FIT@Home study. *Eur J Prev Cardiol* 2014;21:26-31. doi: 10.1177/2047487314552606
71. Lan C, Chen SY, Hsu CJ, et al. Improvement of cardiorespiratory function after percutaneous transluminal coronary angioplasty or coronary artery bypass grafting. *Am J Phys Med Rehabil* 2002;81(5):336-41. doi: 10.1097/00002060-200205000-00003
72. Lavie CJ, Milani RV. Adverse psychological and coronary risk profiles in young patients with coronary artery disease and benefits of formal cardiac rehabilitation. *Arch Intern Med* 2006;166(17):1878-83. doi: 10.1001/archinte.166.17.1878
73. Lazzeroni D, Castiglioni P, Bini M, et al. Improvement in aerobic capacity during cardiac rehabilitation in coronary artery disease patients: Is there a role for autonomic adaptations? *Eur J Prev Cardiol* 2017;24(4):357-64. doi: 10.1177/2047487316681341
74. Lee BC, Chen SY, Hsu HC, et al. Effect of cardiac rehabilitation on myocardial perfusion reserve in postinfarction patients. *Am J Cardiol* 2008;101(10):1395-402. doi: 10.1016/j.amjcard.2008.01.014
75. Lee BJ, Go JY, Kim AR, et al. Quality of Life and Physical Ability Changes After Hospital-Based Cardiac Rehabilitation in Patients With Myocardial Infarction. *Ann Rehab Med* 2017;41(1):121-28. doi: 10.5535/arm.2017.41.1.121
76. Leitch JW, Newling RP, Basta M, et al. Randomized trial of a hospital-based exercise training program after acute myocardial infarction: Cardiac autonomic effects. *J Am Col Cardiol* 1997;29(6):1263-68. doi: 10.1016/S0735-1097%2897%2900050-8
77. Lim SK, Han JY, Choe YR. Comparison of the Effects of Cardiac Rehabilitation Between Obese and Non-obese Patients After Acute Myocardial Infarction. *Ann Rehab Med* 2016;40(5):924-32. doi: 10.5535/arm.2016.40.5.924
78. Messin R, Lenaers A, Azama M, et al. Influence of short-term physical training on exercise tolerance after myocardial infarction. *Eur J Cardiol* 1977;5(2):155-65.
79. Mifkova L, Varnay F, Fiser B, et al. Spiroergometry before and after ambulatory exercise training in patients after acute myocardial infarction. *Scripta Medica Facultatis Medicae Universitatis Brunensis Masarykianae* 2010;83(2):115-20.
80. Milani RV, Lavie CJ, Cassidy MM. Effects of cardiac rehabilitation and exercise training programs on depression in patients after major coronary events. *Am Heart J* 1996;132(4):726-32.



81. Milani RV, Lavie CJ. The effects of body composition changes to observed improvements in cardiopulmonary parameters after exercise training with cardiac rehabilitation. *Chest* 1998;113(3):599-601.
82. Milani RV, Lavie CJ. Reducing Psychosocial Stress: A Novel Mechanism of Improving Survival from Exercise Training. *Am J Med* 2009;122(10):931-38. doi: 10.1016/j.amjmed.2009.03.028
83. Mimura J, Yuasa F, Yuyama R, et al. The effect of residential exercise training on baroreflex control of heart rate and sympathetic nerve activity in patients with acute myocardial infarction. *Chest* 2005;127(4):1108-15. doi: 10.1378/chest.127.4.1108
84. Moholdt TT, Amundsen BH, Rustad LA, et al. Aerobic interval training versus continuous moderate exercise after coronary artery bypass surgery: A randomized study of cardiovascular effects and quality of life. *Am Heart J* 2009;158(6):1031-37. doi: 10.1016/j.ahj.2009.10.003
85. Moholdt T, Aamot IL, Granøien I, et al. Aerobic interval training increases peak oxygen uptake more than usual care exercise training in myocardial infarction patients: a randomized controlled study. *Clin Rehabil* 2011;26(1):33-44.
86. Moholdt T, Vold MB, Grimsmo J, et al. Home-Based Aerobic Interval Training Improves Peak Oxygen Uptake Equal to Residential Cardiac Rehabilitation: A Randomized, Controlled Trial. *PLoS One* 2012;7(7):6. doi: 10.1371/journal.pone.0041199
87. Morris R, Digenio A, Padayachee GN, et al. The effect of a 6-month cardiac rehabilitation programme on serum lipoproteins and apoproteins A1 and B and lipoprotein a. *S Afr Med J*, S 1993;83(5):315-8.
88. Motohiro M, Yuasa F, Hattori T, et al. Cardiovascular adaptations to exercise training after uncomplicated acute myocardial infarction. *Am J Phys Med Rehabil* 2005;84(9):684-91. doi: 10.1097/01.phm.0000171167.31010.f4
89. Mourot L, Boussuges A, Maunier S, et al. Cardiovascular Rehabilitation in Patients With Diabetes. *J Cardiopulmon Rehabil Prev* 2010;30(3):157-64. doi: 10.1097/HCR.0b013e3181c565fe
90. Munk PS, Staal EM, Butt N, et al. High-intensity interval training may reduce in-stent restenosis following percutaneous coronary intervention with stent implantation. A randomized controlled trial evaluating the relationship to endothelial function and inflammation. *Am Heart J* 2009;158(5):734-41. doi: 10.1016/j.ahj.2009.08.021
91. Nieuwland W, Berkhuisen MA, Landsman ML, et al. Training effects on peak VO<sub>2</sub>, specific of the mode of movement, in rehabilitation of patients with coronary artery disease. *Int J Sports Med* 1998;19(5):358-63.
92. Nieuwland W, Berkhuisen MA, van Veldhuisen DJ, et al. Differential effects of high-frequency versus low-frequency exercise training in rehabilitation of patients with coronary artery disease. *J Am Col Cardiol* 2000;36(1):202-07. doi: 10.1016/s0735-1097(00)00692-6
93. Nordrehaug JE, Danielsen R, Bjorkhaug A, et al. Physiological effects of short-term training after myocardial infarction. *Int J Cardiol* 1989;25(2):179-84. doi: 10.1016/0167-5273%2889%2990105-8
94. Omiya K, Minami K, Sato Y, et al. Impaired beta-cell function attenuates training effects by reducing the increase in heart rate reserve in patients with myocardial infarction. *J Cardiol* 2015;65(1-2):128-33. doi: 10.1016/j.jjcc.2014.04.012
95. Onishi T, Shimada K, Sunayama S, et al. Effects of cardiac rehabilitation in patients with metabolic syndrome after coronary artery bypass grafting. *J Cardiol* 2009;53(3):381-87. doi: 10.1016/j.jjcc.2009.01.004
96. Osterhues DJ, Holly RG, Sassenrath EN, et al. Effects of cardiac rehabilitation: Localized cold response. *J Cardiopulmon Rehabil* 1988;8(1):9-16.

97. Oya M, Itoh H, Kato K, et al. Effects of exercise training on the recovery of the autonomic nervous system and exercise capacity after acute myocardial infarction. *Jpn Circ J* 1999;63(11):843-48. doi: 10.1253/jcj.63.843
98. Pardaens S, Moerman V, Willems AM, et al. Impact of the preoperative risk and the type of surgery on exercise capacity and training after valvular surgery. *Am J Cardiol* 2014;113(8):1383-9. doi: 10.1016/j.amjcard.2014.01.413
99. Pavia L, Orlando G, Myers J, et al. The effect of beta-blockade therapy on the response to exercise training in postmyocardial infarction patients. *Clin Cardiol* 1995;18(12):716-20.
100. Ribeiro F, Alves AJ, Teixeira M, et al. Exercise training enhances autonomic function after acute myocardial infarction: a randomized controlled study. *Rev Port Cardiol* 2012;31(2):135-41. doi: 10.1016/j.repc.2011.12.009
101. Rognum O, Hetland E, Helgerud J, et al. High intensity aerobic interval exercise is superior to moderate intensity exercise for increasing aerobic capacity in patients with coronary artery disease. *Eur J Cardiovasc Prev Rehabil* 2004;11(3):216-22. doi: 10.1097/01.hjr.0000131677.96762.0c
102. Rossi P, Giordano A, Tamiz A, et al. Effects of training and of verapamil on exercise capacity in patients recovering from myocardial infarction. A double-blind study. *Cardiology* 1979;64(6):372-85.
103. Sakuragi S, Takagi S, Suzuki S, et al. Patients with large myocardial infarction gain a greater improvement in exercise capacity after exercise training than those with small to medium infarction. *Clin Cardiol* 2003;26(6):280-86. doi: 10.1002/clc.4950260608
104. Salvetti XM, Oliveira JA, Servantes DM, et al. How much do the benefits cost? Effects of a home-based training programme on cardiovascular fitness, quality of life, programme cost and adherence for patients with coronary disease. *Clin Rehabil* 2008;22(10-11):987-96. doi: 10.1177/0269215508093331
105. Savage PD, Antkowiak M, Ades PA. Failure to Improve Cardiopulmonary Fitness in Cardiac Rehabilitation. *J Cardiopulmon Rehabil Prev* 2009;29(5):284-91.
106. Savage PD, Rengo JL, Menzies KE, et al. Cardiac rehabilitation after heart valve surgery: Comparison with coronary artery bypass graft patients. *J Cardiopulmon Rehabil Prev* 2015;35(4):231-37. doi: 10.1097/HCR.0000000000000104
107. Sumide T, Shimada K, Ohmura H, et al. Relationship between exercise tolerance and muscle strength following cardiac rehabilitation: Comparison of patients after cardiac surgery and patients with myocardial infarction. *J Cardiol* 2009;54(2):273-81. doi: 10.1016/j.jjcc.2009.05.016
108. Suskin NG, Heigenhauser G, Afzal R, et al. The effects of exercise training on insulin resistance in patients with coronary artery disease. *Eur J Cardiovasc Prev Rehabil* 2007;14(6):803-08.
109. Suzuki S, Takaki H, Yasumura Y, et al. Assessment of quality of life with 5 different scales in patients participating in comprehensive cardiac rehabilitation after acute myocardial infarction. *Circ J* 2005;69(12):1527-34. doi: 10.1253/circj.69.1527
110. Svacinova H, Novakova M, Placheta Z, et al. Benefit of combined cardiac rehabilitation on exercise capacity and cardiovascular parameters in patients with type 2 diabetes. *Tohoku J Exp Med* 2008;215(1):103-11. doi: 10.1620/tjem.215.103
111. Szmedra L, Bacharach DW, Buckenmeyer PJ, et al. Response of Patients with Coronary-Arteri Disease Stratified by Ejection Fraction Following Short-Term Training. *Int J Cardiol* 1994;46(3):209-22. doi: 10.1016/0167-5273(94)90243-7
112. Takaya Y, Kumasaka R, Arakawa T, et al. Impact of cardiac rehabilitation on renal function in patients with and without chronic kidney disease after acute myocardial infarction. *Circ J* 2014;78(2):377-84. doi: 10.1253/circj.CJ-13-0779

113. Tanabe K, Yokoyama Y, Samejima H, et al. Effects of anaerobic threshold level exercise training upon oxygen uptake kinetics and sympathetic nervous activity in patients with chronic phase of myocardial infarction. *J Noninvasive Cardiol* 1998;2(2):31-37.
114. Temfemo A, Chlif M, Mandengue SH, et al. Is there a beneficial effect difference between age, gender, and different cardiac pathology groups of exercise training at ventilatory threshold in cardiac patients? *Cardiol J* 2011;18(6):632-38. doi: 10.5603/cj.2011.0026
115. Tsai SW, Lin YW, Wu SK. The effect of cardiac rehabilitation on recovery of heart rate over one minute after exercise in patients with coronary artery bypass graft surgery. *Clin Rehabil* 2005;19(8):843-9.
116. Uchida I, Takaki H, Kobayashi Y, et al. O<sub>2</sub> extraction during exercise determines training effect after cardiac rehabilitation in myocardial infarction. *Circ J* 2002;66(10):891-96. doi: 10.1253/circj.66.891
117. Ueshima K, Suzuki T, Nasu M, et al. Effects of exercise training on left ventricular function evaluated by the Tei index in patients with myocardial infarction. *Circ J* 2005;69(5):564-66. doi: 10.1253/circj.69.564
118. Vanhees L, Fagard R, Detry JM, et al. Electrocardiographic changes after physical training in patients with myocardial infarction. *J Am Col Cardiol* 1983;2(6):1068-72.
119. Vanhees L, Stevens A, Schepers D, et al. Determinants of the effects of physical training and of the complications requiring resuscitation during exercise in patients with cardiovascular disease. *Eur J Cardiovasc Prev Rehabil* 2004;11(4):304-12.
120. Vysoky R, Fiala J, Dosbaba F, et al. Preventive Training Programme for Patients after Acute Coronary Event-- Correlation between Selected Parameters and Age Groups. *Cent Eur J Public Health* 2015;23(3):208-13.
121. Wilmore JH, Wambsgans KC, Kunkel RC, et al. Effect of beta-adrenergic blockade on achievement of the trained state in post-MI patients: Nonselective vs beta<sub>1</sub>-selective blockers. *J Cardiopulmon Rehabil* 1990;10(2):50-57.
122. Wu SK, Lin YW, Chen CL, et al. Cardiac rehabilitation vs. home exercise after coronary artery bypass graft surgery: a comparison of heart rate recovery. *Am J Phys Med Rehabil* 2006;85(9):711-7.
123. Wu YT, Wu YW, Hwang CL, et al. Changes in diastolic function after exercise training in patients with and without diabetes mellitus after coronary artery bypass surgery. A randomized controlled trial. *Eur J Phys Rehabil Med* 2012;48(3):351-60.
124. Yamamoto A, Tanabe K, Yokoyama Y, et al. Influence of aerobic exercise training on brain natriuretic peptide secretion in patients in the chronic phase of myocardial infarction. *Jpn Circ J* 1998;62(9):658-64. doi: 10.1253/jcj.62.658
125. Yoshida T, Kohzuki M, Yoshida K, et al. Physical and psychological improvements after phase II cardiac rehabilitation in patients with myocardial infarction. *Nurs Health Sci* 1999;1(3):163-70.
126. Zanettini R, Centeleghe P, Ratti F, et al. Training prescription in patients on beta-blockers: percentage peak exercise methods or self-regulation? *Eur J Prev Cardiol* 2012;19(2):205-12. doi: 10.1177/1741826711398823
127. Zbinden R, Zbinden S, Meier P, et al. Coronary collateral flow in response to endurance exercise training. *Eur J Cardiovasc Prev Rehabil* 2007;14(2):250-57. doi: 10.1097/HJR.0b013e3280565dee
128. Zheng H, Luo M, Shen Y, et al. Effects of 6 months exercise training on ventricular remodelling and autonomic tone in patients with acute myocardial infarction and percutaneous coronary intervention. *J Rehabil Med* 2008;40(9):776-9. doi: 10.2340/16501977-0254

**Supplementary Material 5.** Outcomes of risk of bias assessment.

| Study                             | Study purpose (/1) | Study design (/2) <sup>a</sup> | Sample (/1) | Reliability and validity (/1) | Intervention (/1) | Compliance (/2) <sup>b</sup> | Statistical analyses (/1) | Conclusions (/1) | Total (/10) |
|-----------------------------------|--------------------|--------------------------------|-------------|-------------------------------|-------------------|------------------------------|---------------------------|------------------|-------------|
| Aamot et al. <sup>1</sup>         | ✓                  | ✓ / ✓                          | X           | X                             | ✓                 | ✓ / ✓                        | ✓                         | ✓                | 8           |
| Aamot et al. <sup>2</sup>         | ✓                  | ✓ / ✓                          | X           | ✓                             | X                 | ✓ / ✓                        | ✓                         | ✓                | 8           |
| Ades et al. <sup>3</sup>          | X                  | X / X                          | X           | X                             | ✓                 | X / ✓                        | ✓                         | ✓                | 4           |
| Ades et al. <sup>4</sup>          | ✓                  | X / X                          | X           | X                             | ✓                 | X / X                        | ✓                         | ✓                | 4           |
| Ades et al. <sup>5</sup>          | ✓                  | ✓ / X                          | X           | X                             | ✓                 | X / X                        | ✓                         | ✓                | 5           |
| Ades et al. <sup>6</sup>          | X                  | ✓ / X                          | X           | X                             | ✓                 | ✓ / X                        | ✓                         | ✓                | 5           |
| Akashi et al. <sup>7</sup>        | ✓                  | X / X                          | X           | X                             | ✓                 | ✓ / X                        | ✓                         | ✓                | 5           |
| Arak-Luckmann et al. <sup>8</sup> | ✓                  | X / X                          | X           | X                             | ✓                 | X / X                        | ✓                         | ✓                | 4           |
| Arthur et al. <sup>9</sup>        | ✓                  | ✓ / ✓                          | X           | X                             | ✓                 | ✓ / X                        | ✓                         | ✓                | 7           |
| Arvan <sup>10</sup>               | X                  | X / X                          | X           | X                             | ✓                 | ✓ / ✓                        | ✓                         | ✓                | 5           |
| Balsam et al. <sup>11</sup>       | ✓                  | X / X                          | X           | X                             | X                 | X / X                        | ✓                         | ✓                | 3           |
| Belardinelli et al. <sup>12</sup> | ✓                  | ✓ / ✓                          | ✓           | X                             | ✓                 | ✓ / X                        | ✓                         | ✓                | 8           |
| Benetti et al. <sup>13</sup>      | ✓                  | ✓ / X                          | X           | X                             | X                 | X / X                        | ✓                         | ✓                | 4           |
| Bilinska et al. <sup>14</sup>     | ✓                  | ✓ / ✓                          | ✓           | X                             | ✓                 | X / X                        | ✓                         | ✓                | 7           |
| Bilinska et al. <sup>15</sup>     | ✓                  | ✓ / ✓                          | ✓           | X                             | ✓                 | X / X                        | ✓                         | ✓                | 7           |
| Blumenthal et al. <sup>16</sup>   | ✓                  | X / ✓                          | ✓           | X                             | ✓                 | ✓ / ✓                        | ✓                         | ✓                | 8           |
| Cesari et al. <sup>17</sup>       | ✓                  | X / X                          | X           | X                             | ✓                 | X / X                        | ✓                         | ✓                | 4           |
| Chudilova et al. <sup>18</sup>    | ✓                  | X / X                          | X           | X                             | ✓                 | X / X                        | ✓                         | ✓                | 4           |
| Choo et al. <sup>19</sup>         | ✓                  | ✓ / X                          | X           | ✓                             | ✓                 | X / X                        | ✓                         | ✓                | 6           |
| Chuang et al. <sup>20</sup>       | ✓                  | ✓ / ✓                          | X           | X                             | X                 | X / X                        | ✓                         | ✓                | 5           |
| Chung et al. <sup>21</sup>        | ✓                  | ✓ / ✓                          | X           | X                             | ✓                 | X / X                        | ✓                         | ✓                | 6           |
| Ciske et al. <sup>22</sup>        | ✓                  | X / X                          | X           | ✓                             | ✓                 | X / ✓                        | ✓                         | ✓                | 6           |

| Study                                | Study purpose (/1) | Study design (/2) <sup>a</sup> | Sample (/1) | Reliability and validity (/1) | Intervention (/1) | Compliance (/2) <sup>b</sup> | Statistical analyses (/1) | Conclusions (/1) | Total (/10) |
|--------------------------------------|--------------------|--------------------------------|-------------|-------------------------------|-------------------|------------------------------|---------------------------|------------------|-------------|
| Cottin et al. <sup>23</sup>          | ✓                  | X / X                          | ✓           | X                             | ✓                 | X / X                        | ✓                         | ✓                | 5           |
| Cottin et al. <sup>24</sup>          | ✓                  | X / X                          | X           | X                             | ✓                 | X / X                        | ✓                         | ✓                | 4           |
| Currie et al. <sup>25</sup>          | ✓                  | X / ✓                          | X           | X                             | ✓                 | ✓ / ✓                        | ✓                         | ✓                | 7           |
| Degre et al. <sup>26</sup>           | ✓                  | ✓ / ✓                          | X           | X                             | X                 | X / X                        | ✓                         | ✓                | 5           |
| Detry et al. <sup>27</sup>           | ✓                  | X / X                          | X           | X                             | X                 | X / X                        | ✓                         | ✓                | 3           |
| DeWitt et al. <sup>28</sup>          | X                  | ✓ / X                          | X           | X                             | X                 | X / X                        | ✓                         | ✓                | 3           |
| Dobra.-Wasil. et al. <sup>29</sup>   | X                  | X / X                          | X           | X                             | X                 | X / X                        | ✓                         | ✓                | 2           |
| Dressendorfer et al. <sup>30</sup>   | ✓                  | ✓ / X                          | ✓           | ✓                             | X                 | ✓ / ✓                        | ✓                         | ✓                | 8           |
| Dressendorfer et al. <sup>31</sup>   | ✓                  | ✓ / ✓                          | X           | ✓                             | ✓                 | X / ✓                        | ✓                         | ✓                | 8           |
| Dressendorfer et al. <sup>32</sup>   | ✓                  | ✓ / ✓                          | X           | X                             | ✓                 | ✓ / ✓                        | ✓                         | ✓                | 8           |
| Fontes-Carvalho et al. <sup>33</sup> | ✓                  | ✓ / ✓                          | X           | X                             | X                 | X / X                        | ✓                         | ✓                | 5           |
| Fujimoto et al. <sup>34</sup>        | X                  | ✓ / ✓                          | X           | X                             | ✓                 | X / X                        | ✓                         | ✓                | 5           |
| Ghroubi et al. <sup>35</sup>         | X                  | ✓ / ✓                          | X           | X                             | ✓                 | X / ✓                        | ✓                         | ✓                | 6           |
| Giallauria et al. <sup>36</sup>      | ✓                  | ✓ / ✓                          | ✓           | X                             | ✓                 | X / X                        | ✓                         | ✓                | 7           |
| Giallauria et al. <sup>37</sup>      | ✓                  | ✓ / X                          | ✓           | X                             | ✓                 | X / X                        | ✓                         | ✓                | 6           |
| Giallauria et al. <sup>38</sup>      | ✓                  | ✓ / ✓                          | X           | X                             | ✓                 | ✓ / ✓                        | ✓                         | ✓                | 8           |
| Giallauria et al. <sup>39</sup>      | ✓                  | ✓ / ✓                          | X           | X                             | ✓                 | ✓ / ✓                        | ✓                         | ✓                | 8           |
| Giallauria et al. <sup>40</sup>      | ✓                  | ✓ / ✓                          | ✓           | X                             | ✓                 | ✓ / ✓                        | ✓                         | ✓                | 9           |
| Giallauria et al. <sup>41</sup>      | ✓                  | ✓ / ✓                          | ✓           | X                             | ✓                 | X / ✓                        | ✓                         | ✓                | 8           |
| Goodman et al. <sup>42</sup>         | ✓                  | X / X                          | X           | X                             | ✓                 | X / X                        | ✓                         | ✓                | 4           |
| Gremeaux et al. <sup>43</sup>        | X                  | X / ✓                          | ✓           | X                             | ✓                 | X / X                        | ✓                         | ✓                | 5           |
| Haennel et al. <sup>44</sup>         | X                  | ✓ / ✓                          | X           | X                             | ✓                 | X / ✓                        | ✓                         | ✓                | 6           |
| Han et al. <sup>45</sup>             | ✓                  | ✓ / X                          | X           | X                             | ✓                 | X / X                        | ✓                         | ✓                | 5           |
| Hansen et al. <sup>46</sup>          | ✓                  | X / ✓                          | X           | X                             | ✓                 | X / X                        | ✓                         | ✓                | 5           |

| Study                              | Study purpose (/1) | Study design (/2) <sup>a</sup> | Sample (/1) | Reliability and validity (/1) | Intervention (/1) | Compliance (/2) <sup>b</sup> | Statistical analyses (/1) | Conclusions (/1) | Total (/10) |
|------------------------------------|--------------------|--------------------------------|-------------|-------------------------------|-------------------|------------------------------|---------------------------|------------------|-------------|
| Hansen et al. <sup>47</sup>        | ✓                  | X / ✓                          | X           | X                             | ✓                 | ✓ / X                        | ✓                         | ✓                | 6           |
| Hermes et al. <sup>48</sup>        | ✓                  | ✓ / ✓                          | X           | X                             | ✓                 | X / X                        | ✓                         | ✓                | 6           |
| Hsu et al. <sup>49</sup>           | X                  | X / X                          | ✓           | X                             | ✓                 | X / X                        | ✓                         | ✓                | 4           |
| Iwanaga et al. <sup>50</sup>       | X                  | X / X                          | X           | X                             | ✓                 | X / X                        | ✓                         | ✓                | 3           |
| Izawa et al. <sup>51</sup>         | ✓                  | ✓ / X                          | X           | X                             | ✓                 | X / X                        | ✓                         | ✓                | 5           |
| Izawa et al. <sup>52</sup>         | ✓                  | X / X                          | X           | X                             | ✓                 | X / X                        | ✓                         | ✓                | 4           |
| Izawa et al. <sup>53</sup>         | ✓                  | X / X                          | X           | X                             | ✓                 | X / X                        | ✓                         | ✓                | 4           |
| Joughin et al. <sup>54</sup>       | X                  | X / X                          | X           | X                             | X                 | ✓ / X                        | ✓                         | ✓                | 3           |
| Kalapura et al. <sup>55</sup>      | ✓                  | X / X                          | X           | X                             | ✓                 | X / X                        | ✓                         | ✓                | 4           |
| Kelbaek et al. <sup>56</sup>       | X                  | ✓ / ✓                          | X           | X                             | ✓                 | X / X                        | ✓                         | ✓                | 5           |
| Keteyian et al. <sup>57</sup>      | ✓                  | X / ✓                          | X           | X                             | ✓                 | X / X                        | ✓                         | ✓                | 5           |
| Keyser et al. <sup>58</sup>        | X                  | X / X                          | X           | X                             | ✓                 | ✓ / ✓                        | ✓                         | ✓                | 5           |
| Kida et al. <sup>59</sup>          | X                  | X / X                          | X           | ✓                             | X                 | X / X                        | ✓                         | ✓                | 3           |
| Kim, C et al. <sup>60</sup>        | X                  | X / ✓                          | X           | X                             | ✓                 | X / X                        | ✓                         | ✓                | 4           |
| Kim, C et al. <sup>61</sup>        | ✓                  | X / X                          | ✓           | X                             | ✓                 | X / X                        | ✓                         | ✓                | 5           |
| Kim, C et al. <sup>62</sup>        | ✓                  | X / X                          | X           | X                             | ✓                 | X / X                        | ✓                         | ✓                | 4           |
| Kim, C et al. <sup>63</sup>        | ✓                  | X / ✓                          | ✓           | X                             | ✓                 | X / X                        | ✓                         | ✓                | 6           |
| Kim, H-J et al. <sup>64</sup>      | ✓                  | ✓ / X                          | X           | X                             | X                 | X / X                        | ✓                         | ✓                | 4           |
| Kim, Y-J et al. <sup>65</sup>      | ✓                  | ✓ / X                          | X           | X                             | ✓                 | X / X                        | ✓                         | ✓                | 5           |
| Kirwan et al. <sup>66</sup>        | ✓                  | X / X                          | X           | X                             | ✓                 | ✓ / X                        | ✓                         | ✓                | 5           |
| Koba et al. <sup>67</sup>          | ✓                  | ✓ / X                          | ✓           | X                             | X                 | ✓ / X                        | ✓                         | ✓                | 6           |
| Kodis et al. <sup>68</sup>         | X                  | X / X                          | X           | X                             | X                 | X / X                        | ✓                         | ✓                | 2           |
| Korzen.-Kuba. et al. <sup>69</sup> | X                  | ✓ / ✓                          | X           | X                             | ✓                 | X / X                        | ✓                         | ✓                | 5           |
| Kraal et al. <sup>70</sup>         | X                  | ✓ / ✓                          | X           | X                             | ✓                 | ✓ / ✓                        | ✓                         | ✓                | 7           |

| Study                           | Study purpose (/1) | Study design (/2) <sup>a</sup> | Sample (/1) | Reliability and validity (/1) | Intervention (/1) | Compliance (/2) <sup>b</sup> | Statistical analyses (/1) | Conclusions (/1) | Total (/10) |
|---------------------------------|--------------------|--------------------------------|-------------|-------------------------------|-------------------|------------------------------|---------------------------|------------------|-------------|
| Lan et al. <sup>71</sup>        | X                  | X / X                          | X           | X                             | X                 | √ / X                        | √                         | √                | 3           |
| Lavie et al. <sup>72</sup>      | X                  | X / X                          | X           | X                             | √                 | X / X                        | √                         | √                | 3           |
| Lazzeroni et al. <sup>73</sup>  | X                  | X / X                          | X           | X                             | √                 | √ / √                        | √                         | √                | 5           |
| Lee et al. <sup>74</sup>        | √                  | √ / √                          | X           | X                             | X                 | X / X                        | √                         | √                | 5           |
| Lee et al. <sup>75</sup>        | √                  | √ / X                          | X           | X                             | √                 | X / X                        | √                         | √                | 5           |
| Leitch et al. <sup>76</sup>     | √                  | √ / √                          | X           | X                             | X                 | X / X                        | √                         | √                | 5           |
| Lim et al. <sup>77</sup>        | √                  | √ / X                          | √           | X                             | √                 | X / X                        | √                         | √                | 6           |
| Messin et al. <sup>78</sup>     | √                  | X / X                          | X           | X                             | X                 | X / X                        | √                         | √                | 3           |
| Mifkova et al. <sup>79</sup>    | √                  | X / X                          | X           | X                             | √                 | X / X                        | √                         | √                | 4           |
| Milani et al. <sup>80</sup>     | X                  | X / X                          | X           | X                             | √                 | X / X                        | √                         | √                | 3           |
| Milani et al. <sup>81</sup>     | √                  | X / X                          | X           | X                             | √                 | X / X                        | √                         | √                | 4           |
| Milani et al. <sup>82</sup>     | √                  | X / X                          | X           | X                             | √                 | X / X                        | √                         | √                | 4           |
| Mimura et al. <sup>83</sup>     | √                  | √ / √                          | X           | X                             | √                 | X / X                        | √                         | √                | 6           |
| Moholdt et al. <sup>84</sup>    | √                  | X / √                          | X           | X                             | X                 | √ / √                        | √                         | √                | 6           |
| Moholdt et al. <sup>85</sup>    | √                  | √ / √                          | X           | X                             | X                 | √ / √                        | √                         | √                | 7           |
| Moholdt et al. <sup>86</sup>    | √                  | X / √                          | X           | X                             | X                 | X / X                        | √                         | √                | 4           |
| Morris et al. <sup>87</sup>     | √                  | X / X                          | X           | X                             | X                 | X / X                        | √                         | √                | 3           |
| Motohiro et al. <sup>88</sup>   | √                  | √ / X                          | X           | X                             | √                 | X / X                        | √                         | √                | 5           |
| Mourot et al. <sup>89</sup>     | √                  | √ / X                          | √           | X                             | √                 | X / X                        | √                         | √                | 6           |
| Munk et al. <sup>90</sup>       | √                  | √ / √                          | X           | X                             | √                 | X / X                        | √                         | √                | 6           |
| Nieuwland et al. <sup>91</sup>  | X                  | X / √                          | X           | X                             | √                 | X / X                        | √                         | √                | 4           |
| Nieuwland et al. <sup>92</sup>  | √                  | X / √                          | X           | X                             | X                 | X / X                        | √                         | √                | 4           |
| Nordrehaug et al. <sup>93</sup> | √                  | X / X                          | X           | √                             | X                 | X / X                        | √                         | √                | 4           |
| Omiya et al. <sup>94</sup>      | √                  | X / X                          | X           | X                             | √                 | X / X                        | √                         | √                | 4           |

| Study                           | Study purpose (/1) | Study design (/2) <sup>a</sup> | Sample (/1) | Reliability and validity (/1) | Intervention (/1) | Compliance (/2) <sup>b</sup> | Statistical analyses (/1) | Conclusions (/1) | Total (/10) |
|---------------------------------|--------------------|--------------------------------|-------------|-------------------------------|-------------------|------------------------------|---------------------------|------------------|-------------|
| Onishi et al. <sup>95</sup>     | X                  | X / X                          | X           | X                             | X                 | X / X                        | ✓                         | ✓                | 2           |
| Osterhues et al. <sup>96</sup>  | ✓                  | X / X                          | X           | X                             | X                 | ✓ / X                        | ✓                         | ✓                | 4           |
| Oya et al. <sup>97</sup>        | X                  | ✓ / ✓                          | X           | X                             | ✓                 | X / X                        | ✓                         | ✓                | 5           |
| Pardaens et al. <sup>98</sup>   | ✓                  | X / X                          | X           | X                             | X                 | ✓ / X                        | ✓                         | ✓                | 4           |
| Pavia et al. <sup>99</sup>      | ✓                  | X / X                          | X           | X                             | ✓                 | X / X                        | ✓                         | ✓                | 4           |
| Ribeiro et al. <sup>100</sup>   | ✓                  | ✓ / ✓                          | ✓           | X                             | ✓                 | ✓ / X                        | ✓                         | ✓                | 8           |
| Rogmo et al. <sup>101</sup>     | ✓                  | X / ✓                          | X           | X                             | ✓                 | ✓ / X                        | ✓                         | ✓                | 6           |
| Rossi et al. <sup>102</sup>     | ✓                  | ✓ / ✓                          | X           | X                             | ✓                 | X / X                        | ✓                         | ✓                | 6           |
| Sakuragi et al. <sup>103</sup>  | X                  | X / X                          | ✓           | X                             | X                 | X / X                        | ✓                         | ✓                | 3           |
| Salveti et al. <sup>104</sup>   | ✓                  | ✓ / ✓                          | X           | X                             | ✓                 | X / X                        | ✓                         | ✓                | 6           |
| Savage et al. <sup>105</sup>    | ✓                  | X / X                          | X           | X                             | X                 | X / X                        | ✓                         | ✓                | 3           |
| Savage et al. <sup>106</sup>    | ✓                  | X / X                          | X           | X                             | ✓                 | X / X                        | ✓                         | ✓                | 4           |
| Sumide et al. <sup>107</sup>    | ✓                  | X / X                          | X           | X                             | X                 | X / X                        | ✓                         | ✓                | 3           |
| Suskin et al. <sup>108</sup>    | ✓                  | ✓ / ✓                          | X           | X                             | ✓                 | X / X                        | ✓                         | ✓                | 6           |
| Suzuki et al. <sup>109</sup>    | ✓                  | X / X                          | X           | X                             | X                 | X / X                        | ✓                         | ✓                | 3           |
| Svacinova et al. <sup>110</sup> | X                  | X / X                          | X           | X                             | ✓                 | X / X                        | ✓                         | ✓                | 3           |
| Szmedra et al. <sup>111</sup>   | ✓                  | X / X                          | X           | X                             | ✓                 | ✓ / X                        | ✓                         | ✓                | 5           |
| Takaya et al. <sup>112</sup>    | ✓                  | ✓ / X                          | X           | X                             | X                 | X / X                        | ✓                         | ✓                | 4           |
| Tanabe et al. <sup>113</sup>    | ✓                  | X / X                          | X           | X                             | ✓                 | X / X                        | ✓                         | ✓                | 4           |
| Temfemo et al. <sup>114</sup>   | ✓                  | X / X                          | X           | X                             | ✓                 | X / X                        | ✓                         | ✓                | 4           |
| Tsai et al. <sup>115</sup>      | ✓                  | ✓ / ✓                          | X           | X                             | ✓                 | X / X                        | ✓                         | ✓                | 6           |
| Uchida et al. <sup>116</sup>    | X                  | X / X                          | X           | X                             | ✓                 | X / X                        | ✓                         | ✓                | 3           |
| Ueshima et al. <sup>117</sup>   | ✓                  | X / X                          | X           | X                             | X                 | X / X                        | ✓                         | ✓                | 3           |
| Vanhees et al. <sup>118</sup>   | X                  | ✓ / X                          | X           | X                             | X                 | X / X                        | ✓                         | ✓                | 3           |



| Study                           | Study purpose (/1) | Study design (/2) <sup>a</sup> | Sample (/1) | Reliability and validity (/1) | Intervention (/1) | Compliance (/2) <sup>b</sup> | Statistical analyses (/1) | Conclusions (/1) | Total (/10) |
|---------------------------------|--------------------|--------------------------------|-------------|-------------------------------|-------------------|------------------------------|---------------------------|------------------|-------------|
| Vanhees et al. <sup>119</sup>   | ✓                  | X / X                          | X           | X                             | ✓                 | ✓ / X                        | ✓                         | ✓                | 5           |
| Vysoky et al. <sup>120</sup>    | X                  | X / X                          | X           | X                             | ✓                 | X / X                        | ✓                         | ✓                | 3           |
| Wilmore et al. <sup>121</sup>   | ✓                  | X / ✓                          | X           | X                             | X                 | X / X                        | ✓                         | ✓                | 4           |
| Wu et al. <sup>122</sup>        | ✓                  | ✓ / ✓                          | X           | X                             | X                 | X / X                        | ✓                         | ✓                | 5           |
| Wu et al. <sup>123</sup>        | ✓                  | ✓ / ✓                          | ✓           | X                             | ✓                 | X / X                        | ✓                         | ✓                | 7           |
| Yamamoto et al. <sup>124</sup>  | ✓                  | X / X                          | X           | X                             | ✓                 | X / X                        | ✓                         | ✓                | 4           |
| Yoshida et al. <sup>125</sup>   | ✓                  | ✓ / ✓                          | X           | X                             | X                 | X / X                        | ✓                         | ✓                | 5           |
| Zanettini et al. <sup>126</sup> | ✓                  | X / ✓                          | ✓           | X                             | ✓                 | X / X                        | ✓                         | ✓                | 6           |
| Zbinden et al. <sup>127</sup>   | ✓                  | X / X                          | X           | X                             | ✓                 | X / X                        | ✓                         | ✓                | 4           |
| Zheng et al. <sup>128</sup>     | ✓                  | ✓ / ✓                          | X           | X                             | ✓                 | X / X                        | ✓                         | ✓                | 6           |

✓, yes; X, no. For references, see Supplementary Material 4.

<sup>a</sup> The first point indicates that the study was a controlled study. The second point indicates that group allocation was randomised.

<sup>b</sup> The first point indicates that the study reported/controlled for attendance. The second point indicates that the study reported/controlled for compliance with the exercise intensity.

**Supplementary Material 6.** Funnel plots with pseudo 95% confidence limits.

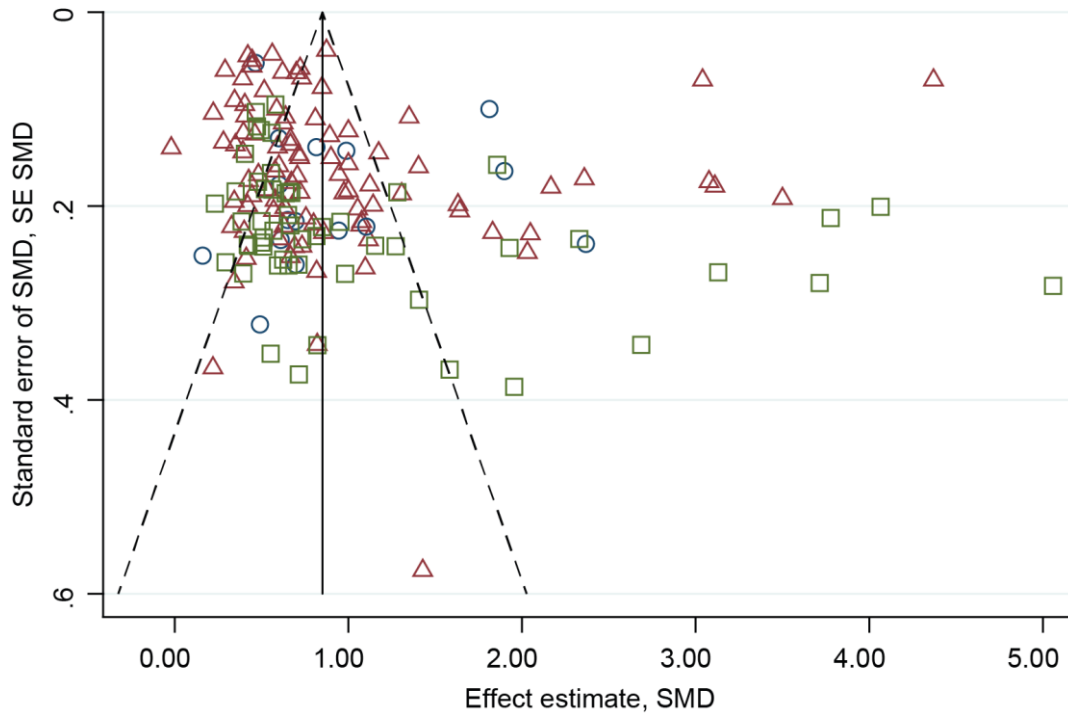

**Figure A.** Funnel plot with pseudo 95% confidence limit for a change in relative  $\dot{V}O_{2peak}$  ( $\text{mL}\cdot\text{kg}^{-1}\cdot\text{min}^{-1}$ ) stratified by exercise intensity.

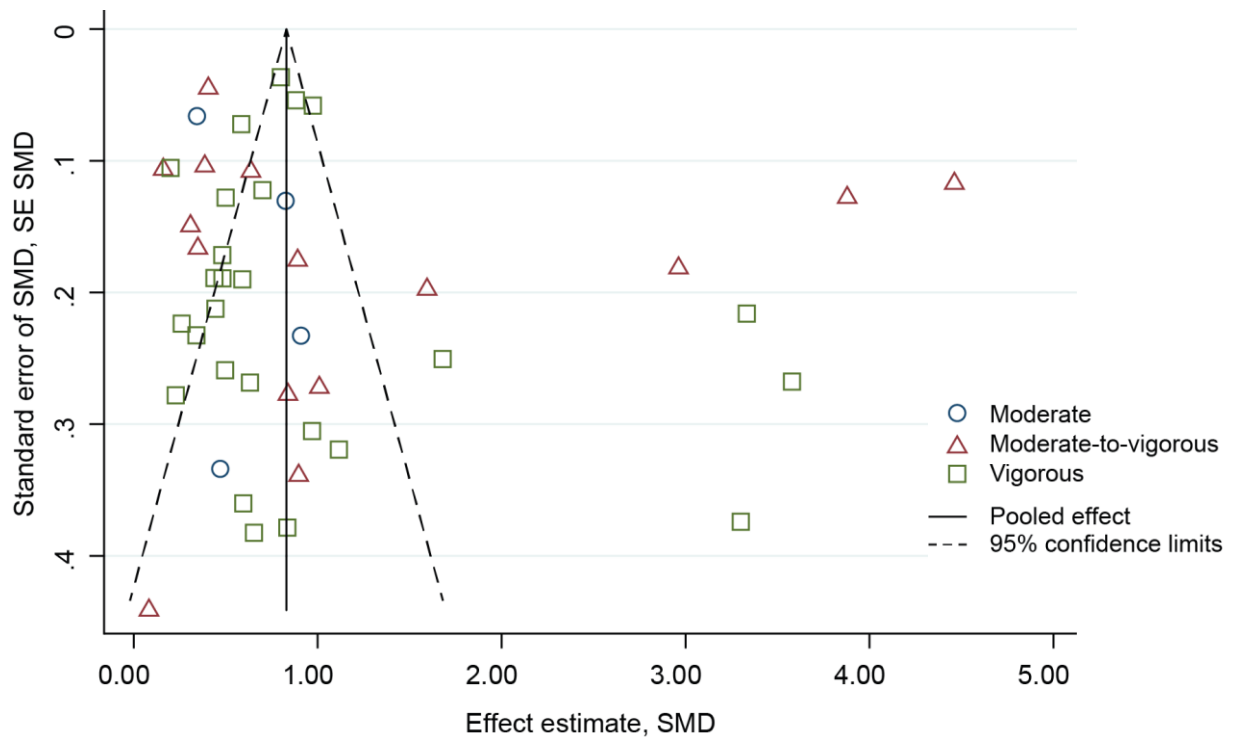

**Figure B.** Funnel plot with pseudo 95% confidence limit for a change in absolute  $\dot{V}O_{2peak}$  ( $\text{L}\cdot\text{min}^{-1}$ ) stratified by exercise intensity.
